# Supplementary material for: Organ-Specific Uptake of Extracellular Vesicles Secreted by Urological Cancer Cells
Source: Cancers (Basel). 2021 Sep 30;13(19):4937. doi: 10.3390/cancers13194937 (PMC8508228; doi:10.3390/cancers13194937)
Supplement: Supplementary file 1 [file cancers-13-04937-s001.zip › cancers-1365399-supplementary.pdf]

Supplementary material to the paper:

## **Organ-specific uptake of extracellular vesicles secreted by urological cancer cells**

*Johannes Linxweiler<sup>1,#</sup>, Anja Kolbinger<sup>1,#</sup>, Dirk Himbert<sup>1</sup>, Philip Zeuschner<sup>1</sup>, Matthias Saar<sup>1</sup>, Michael Stöckle<sup>1</sup> and Kerstin Junker<sup>1</sup>*

<sup>1</sup> Department of Urology, Saarland University, Homburg/Saar, Germany

<sup>#</sup>equal contribution

## Supplementary Table 1

**Supplementary table 1: Results of Nanoparticle Tracking Analysis for all six included cell lines.** NTA was performed with EV isolates diluted as shown in the last column in PBS using a Nanosight LM10 device. For particle size as well as particle concentration, the mean +/- standard error of the mean are given.

| cell line | particle size [nm] | concentration [particles/ml] |       |
|-----------|--------------------|------------------------------|-------|
| 786-O     | 168.8 +/- 3.7      | 4.94e+11 +/- 2.58e+10        | 1:100 |
| HEK       | 166.3 +/- 4.1      | 2.56e+11 +/- 2.04e+10        | 1:100 |
| T24       | 184.2 +/- 19.2     | 2.31e+11 +/- 5.26e+10        | 1:100 |
| HCV29     | 156.9 +/- 0.6      | 1.55e+11 +/- 1.78e+10        | 1:100 |
| VCaP      | 171.6 +/- 2.0      | 2.76e+11 +/- 9.29e+09        | 1:500 |
| BPH-1     | 91.1 +/- 5.4       | 6.59e+11 +/- 7.07e+10        | 1:100 |

## Supplementary Figure S1

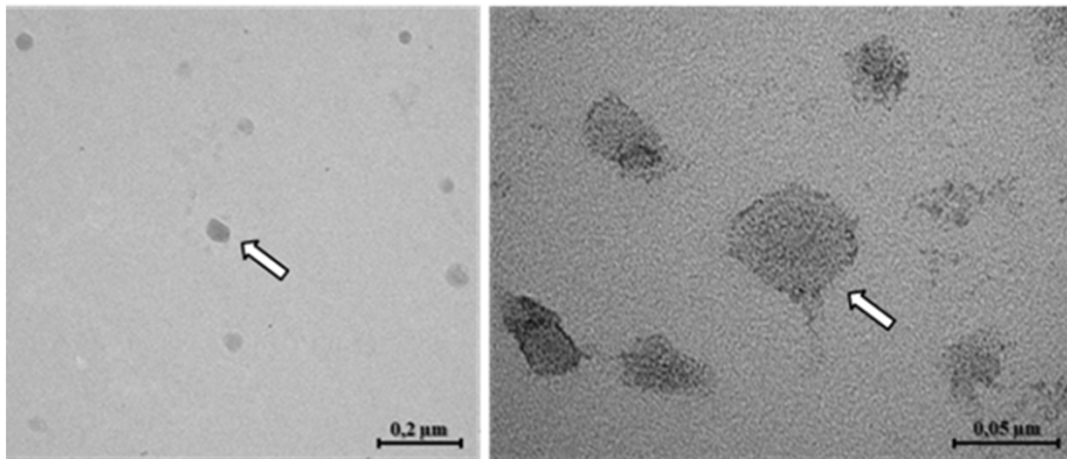

**Supplementary figure S1: TEM pictures of the urothelial carcinoma cell line T24 isolated by ultracentrifugation.**

## Supplementary Figure S2

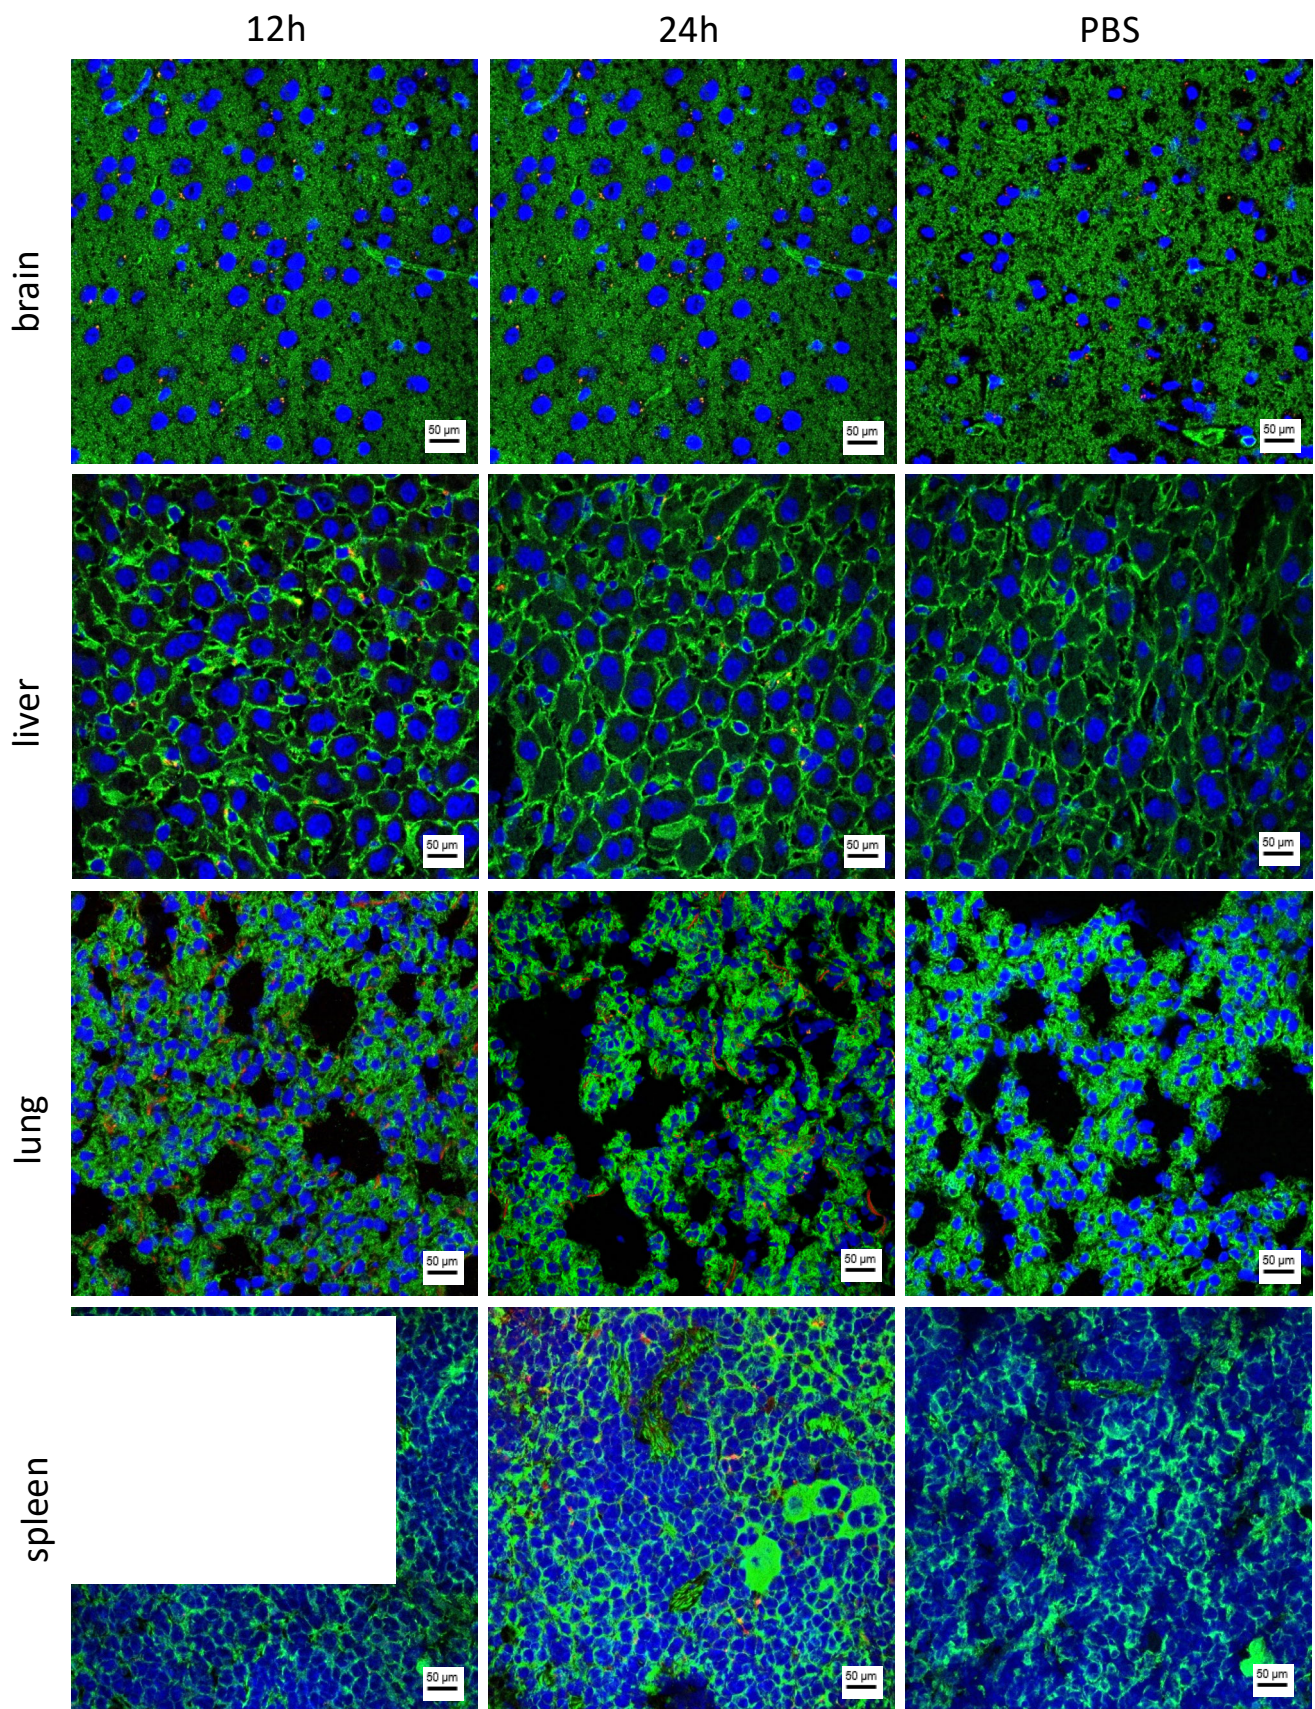

**Supplementary figure S2: Uptake of VCaP extracellular vesicles.** Representative images of the brain, the liver, the lung and the spleen (rows 1-4) 12 and 24 hours after intravenous EV injection (columns 1 and 2, respectively) or after PBS injection (control; columns 3) are shown. Here, slides from animals who had VCaP EVs injected are shown as an example. The cytoskeleton of the cells is marked in green (Phalloidin-Alexa488), their nuclei are marked in blue (DAPI). EVs appear in red (PKH26). Resolution 200fold, scale bar = 50μm.

## Supplementary Figure S3

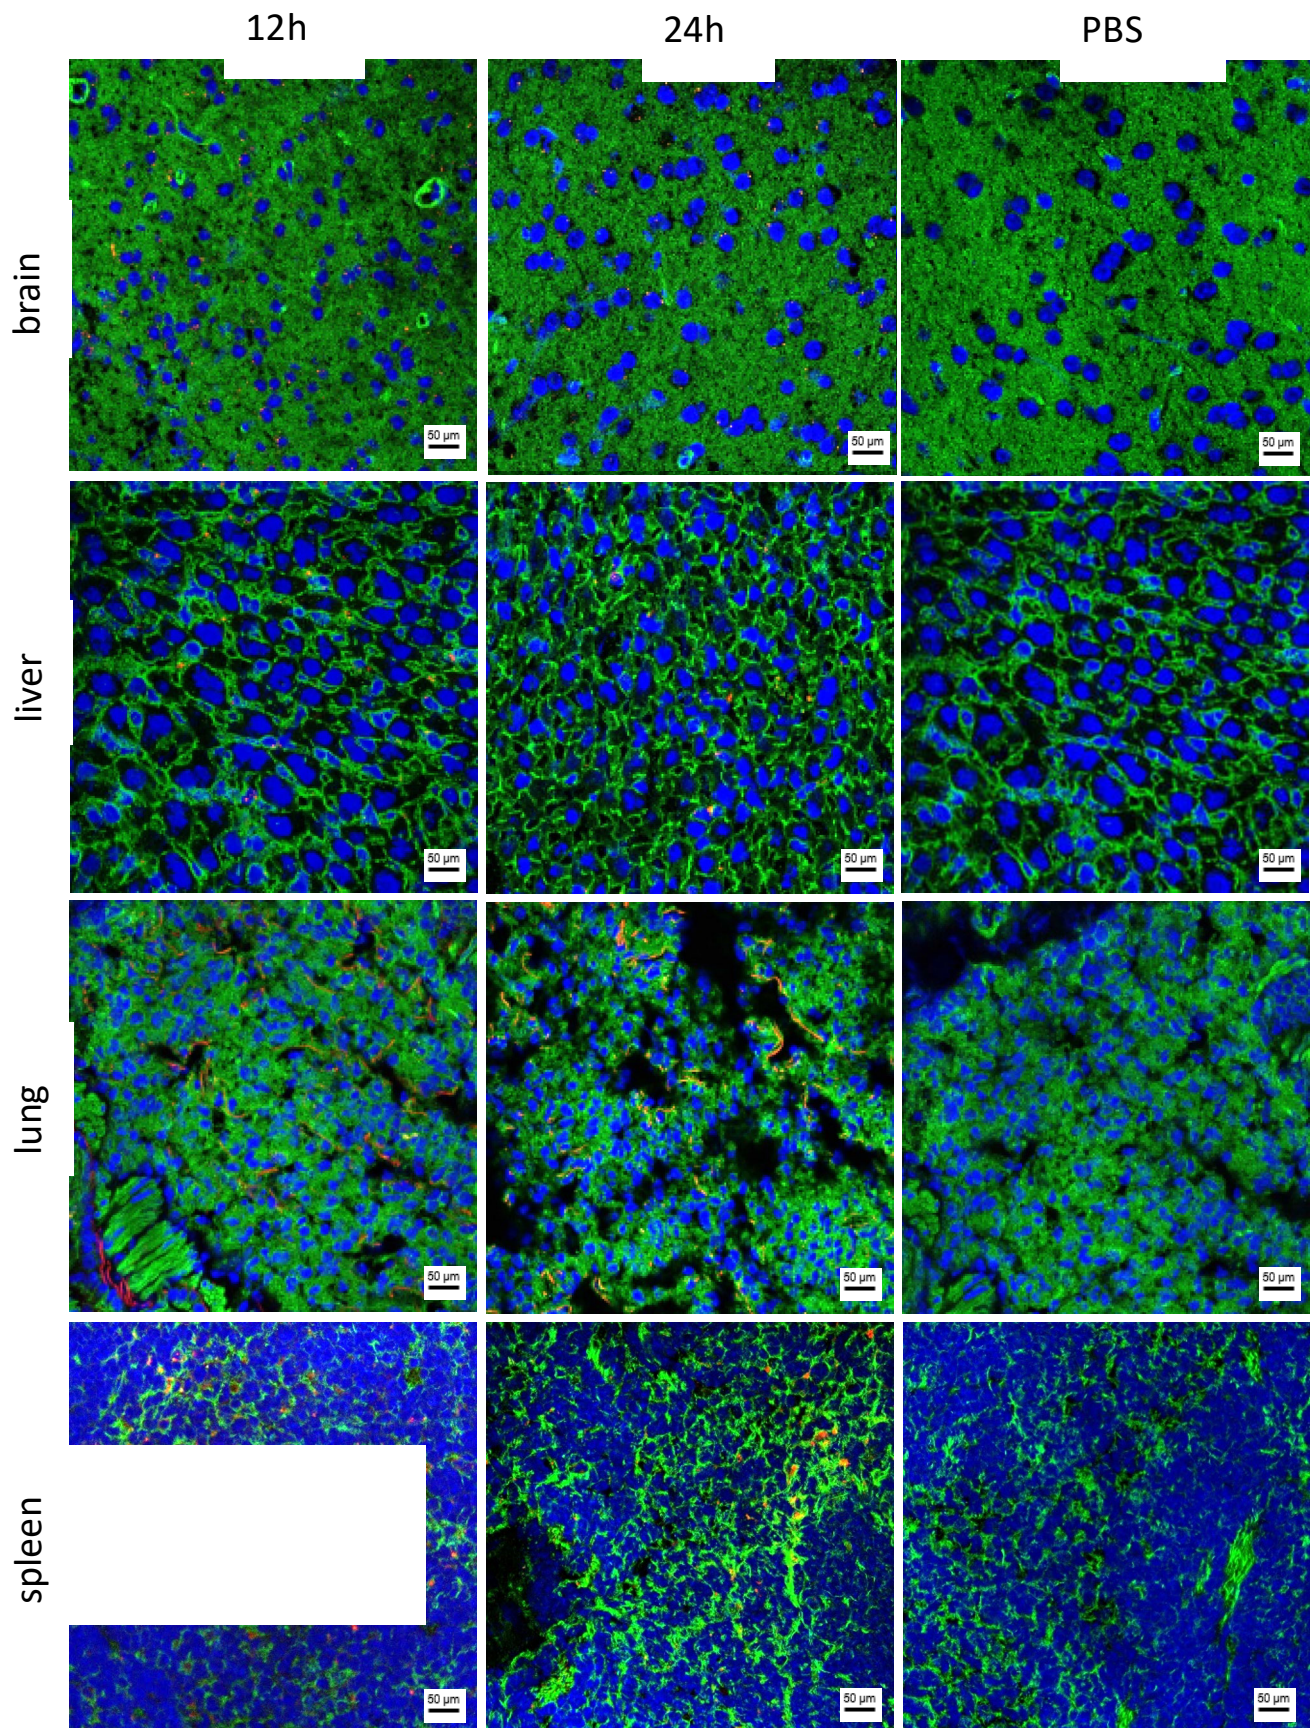

**Supplementary figure S2: Uptake of T24 extracellular vesicles.** Representative images of the brain, the liver, the lung and the spleen (rows 1-4) 12 and 24 hours after intravenous EV injection (columns 1 and 2, respectively) or after PBS injection (control; columns 3) are shown. Here, slides from animals who had T24 EVs injected are shown as an example. The cytoskeleton of the cells is marked in green (Phalloidin-Alexa488), their nuclei are marked in blue (DAPI). EVs appear in red (PKH26). Resolution 200fold, scale bar = 50μm.

## Supplementary Figure S4

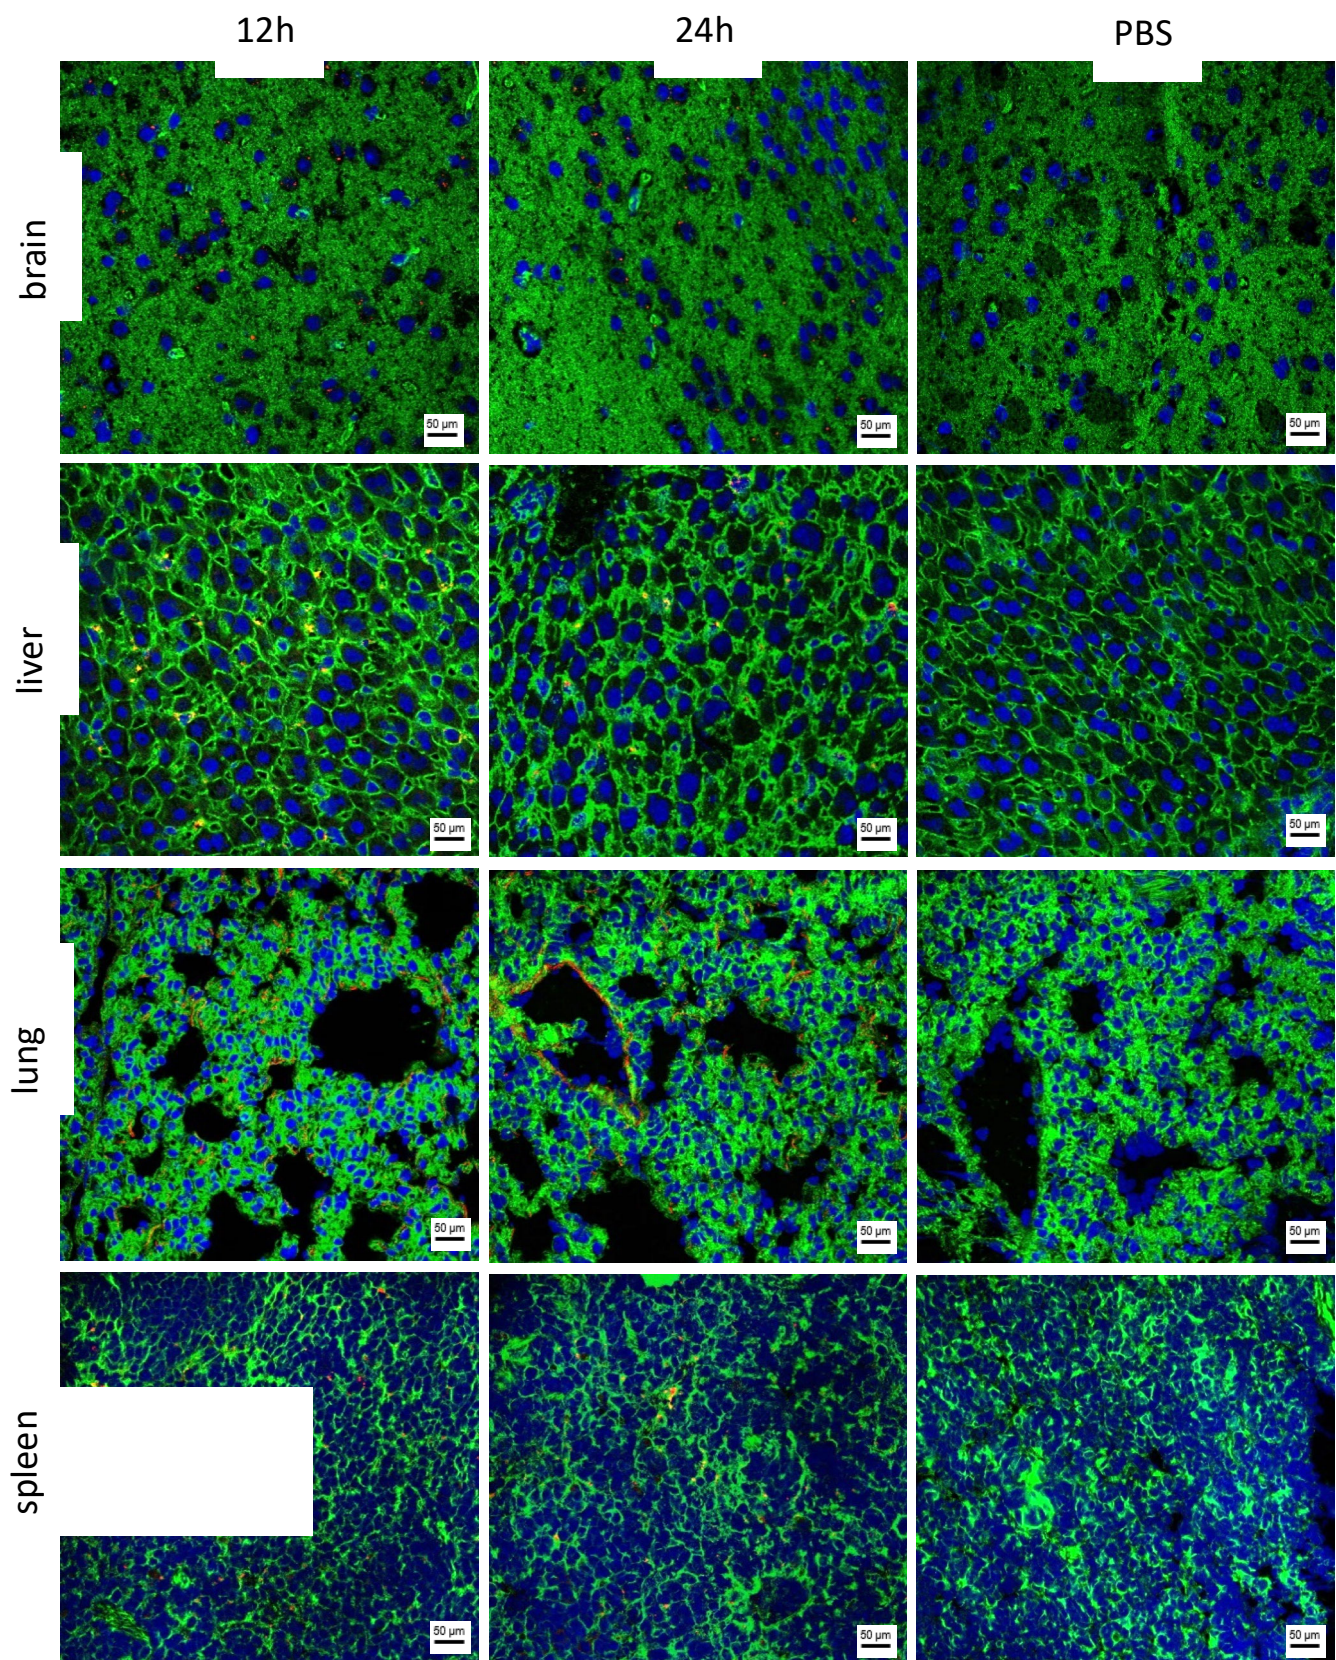

**Supplementary figure S2: Uptake of Hek293 extracellular vesicles.** Representative images of the brain, the liver, the lung and the spleen (rows 1-4) 12 and 24 hours after intravenous EV injection (columns 1 and 2, respectively) or after PBS injection (control; columns 3) are shown. Here, slides from animals who had Hek293 EVs injected are shown as an example. The cytoskeleton of the cells is marked in green (Phalloidin-Alexa488), their nuclei are marked in blue (DAPI). EVs appear in red (PKH26). Resolution 200fold, scale bar = 50μm.

## Supplementary Figure S5

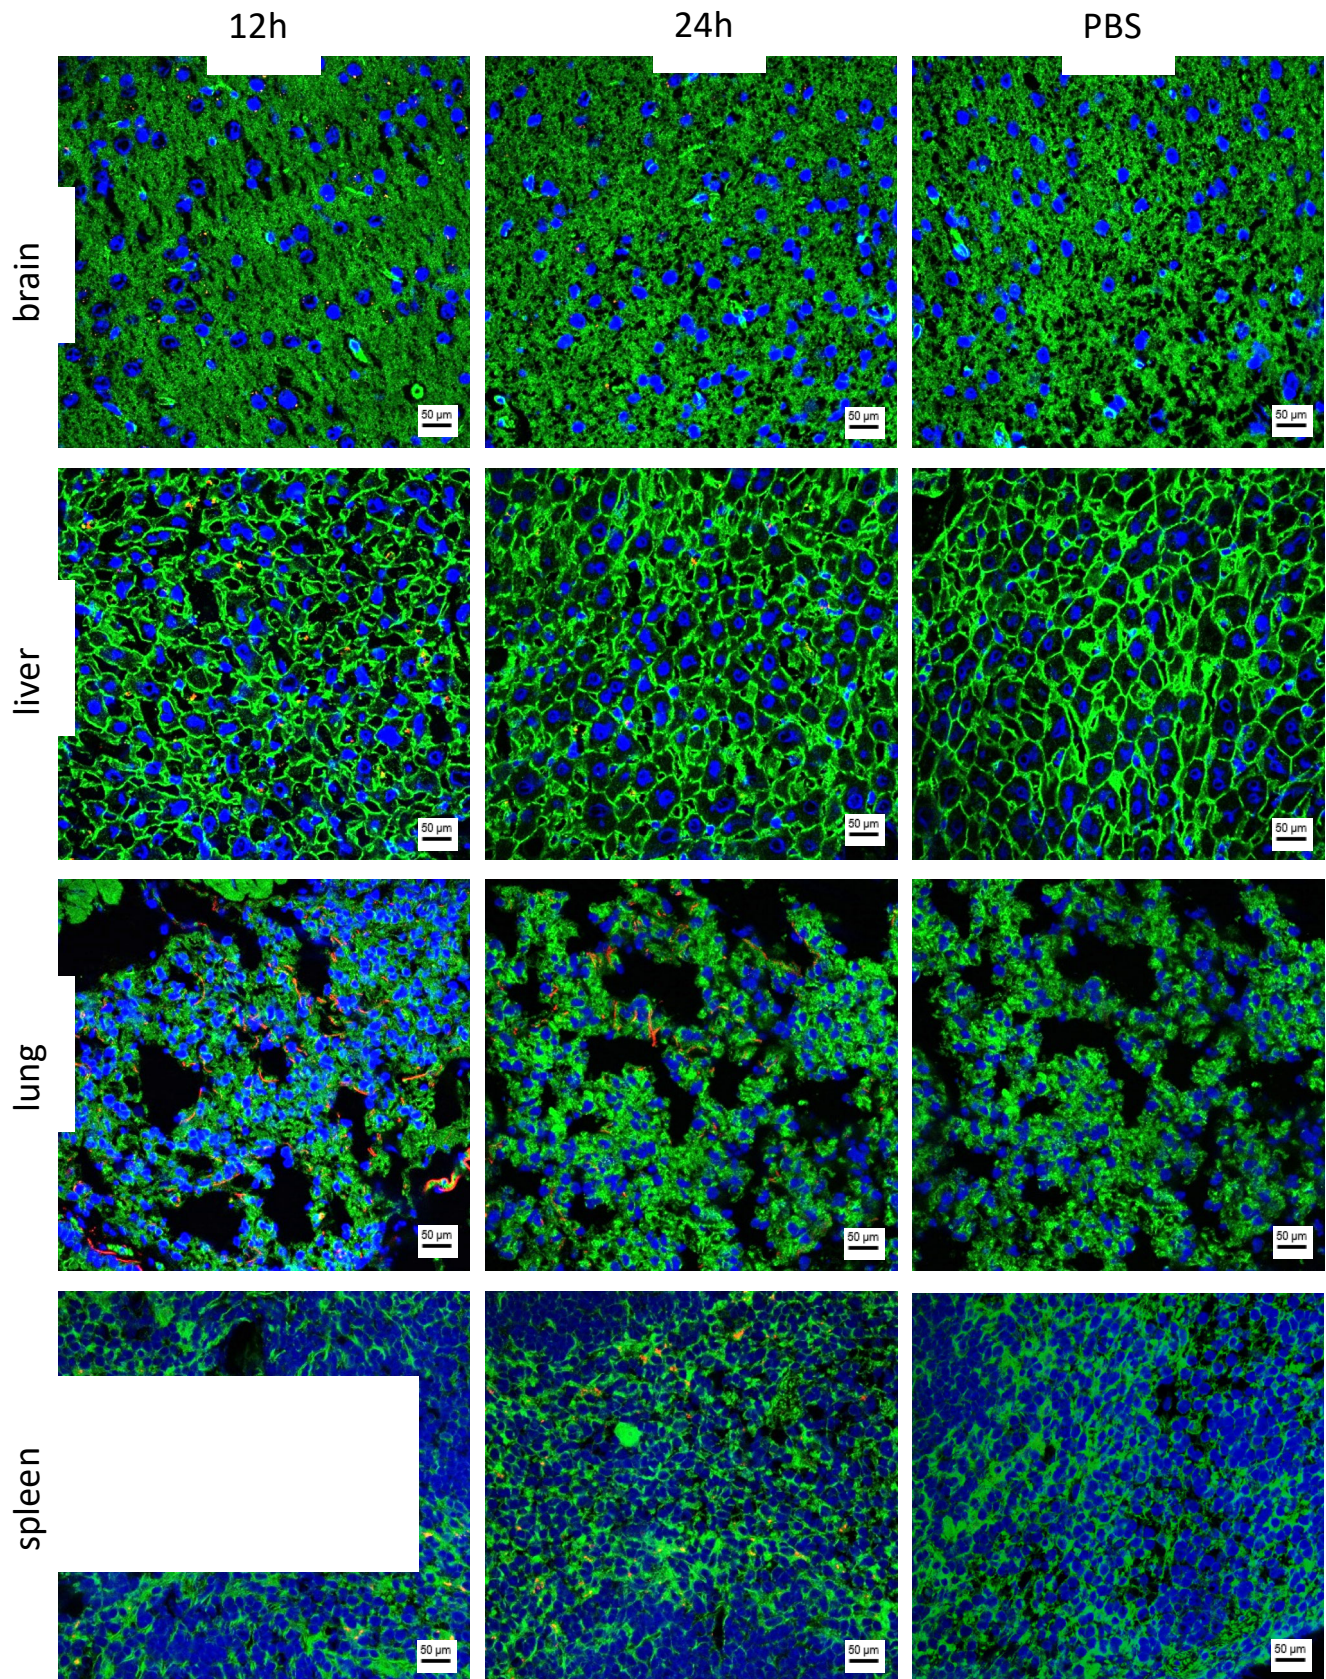

**Supplementary figure S2: Uptake of BPH-1 extracellular vesicles.** Representative images of the brain, the liver, the lung and the spleen (rows 1-4) 12 and 24 hours after intravenous EV injection (columns 1 and 2, respectively) or after PBS injection (control; columns 3) are shown. Here, slides from animals who had BPH-1 EVs injected are shown as an example. The cytoskeleton of the cells is marked in green (Phalloidin-Alexa488), their nuclei are marked in blue (DAPI). EVs appear in red (PKH26). Resolution 200fold, scale bar = 50μm.

## Supplementary Figure S6

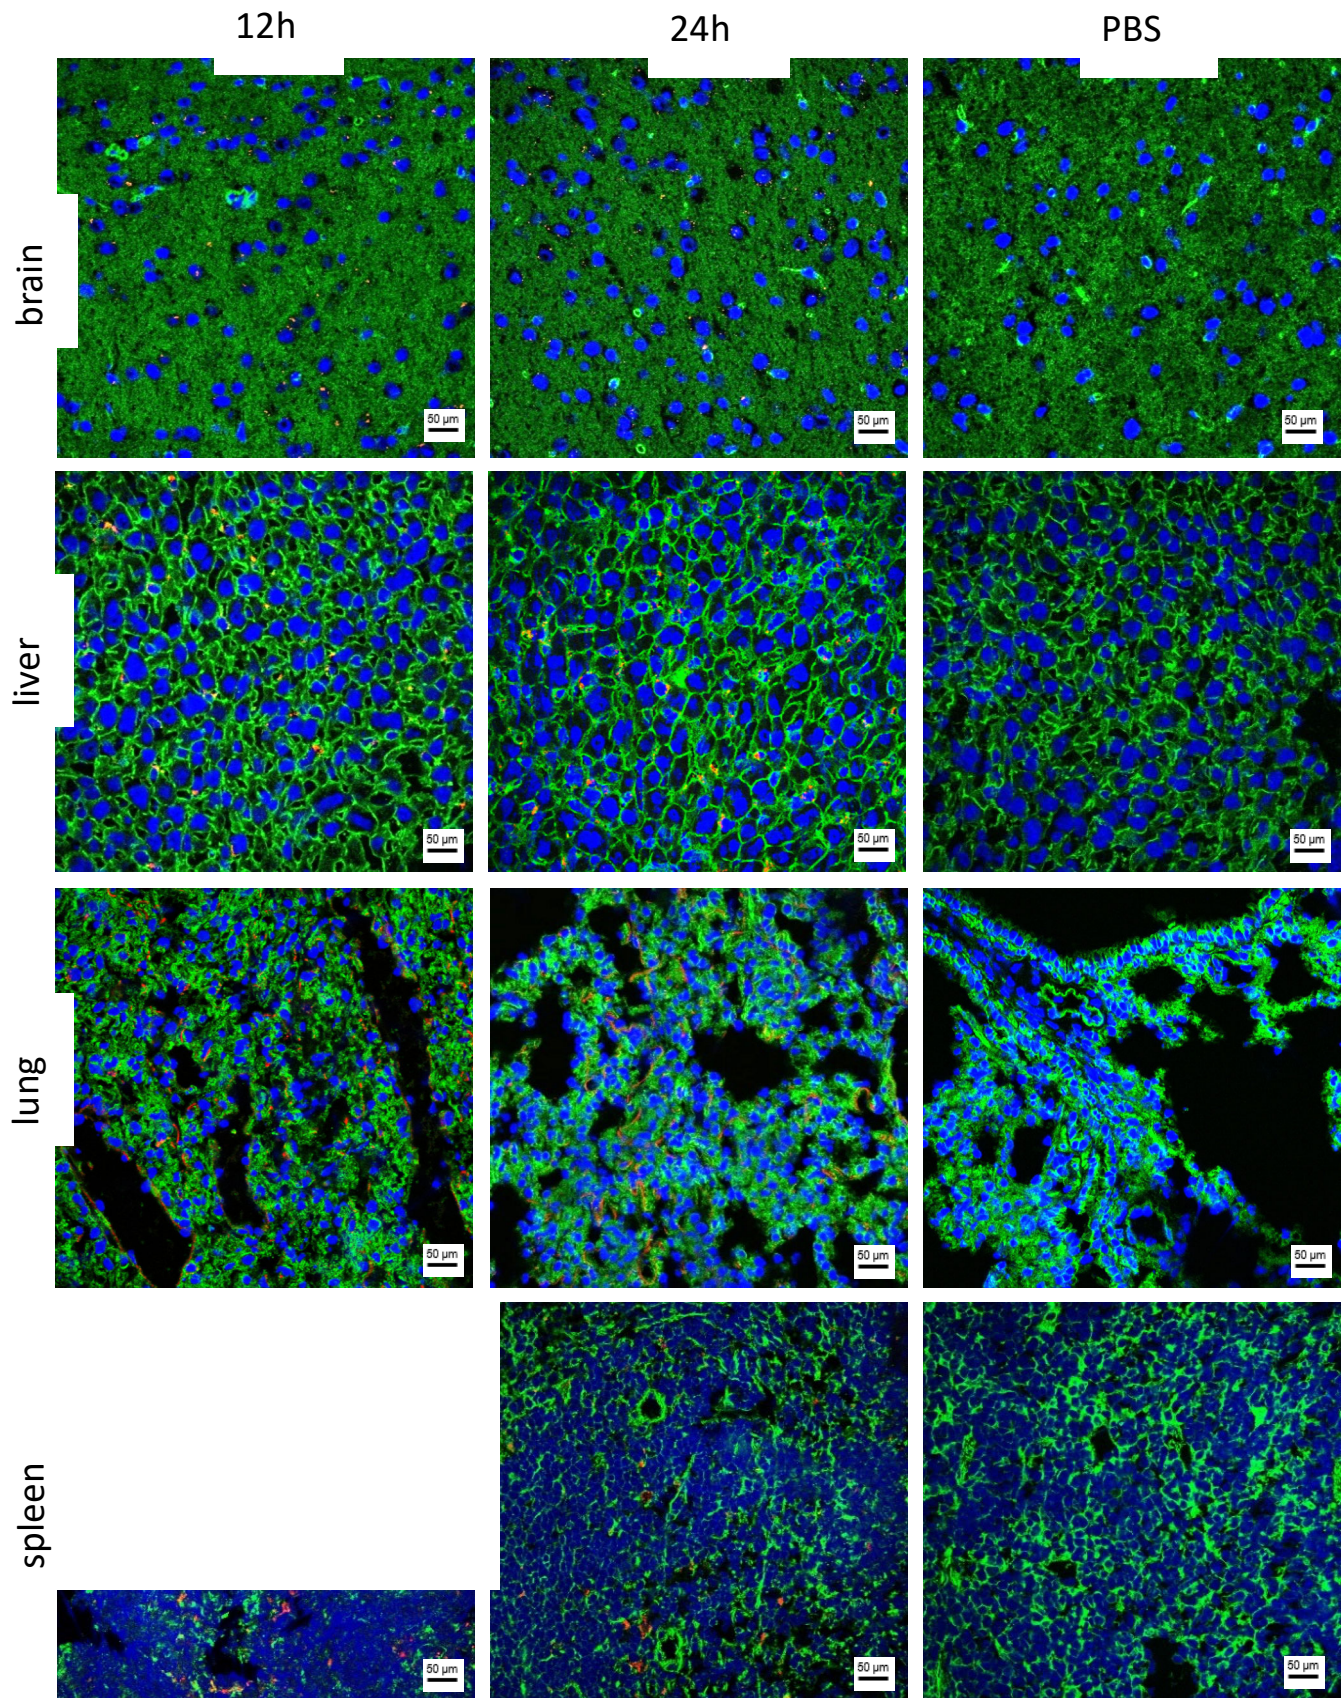

**Supplementary figure S2: Uptake of HCV29 extracellular vesicles.** Representative images of the brain, the liver, the lung and the spleen (rows 1-4) 12 and 24 hours after intravenous EV injection (columns 1 and 2, respectively) or after PBS injection (control; columns 3) are shown. Here, slides from animals who had HCV29 EVs injected are shown as an example. The cytoskeleton of the cells is marked in green (Phalloidin-Alexa488), their nuclei are marked in blue (DAPI). EVs appear in red (PKH26). Resolution 200fold, scale bar = 50μm.

## Supplementary Figure S7

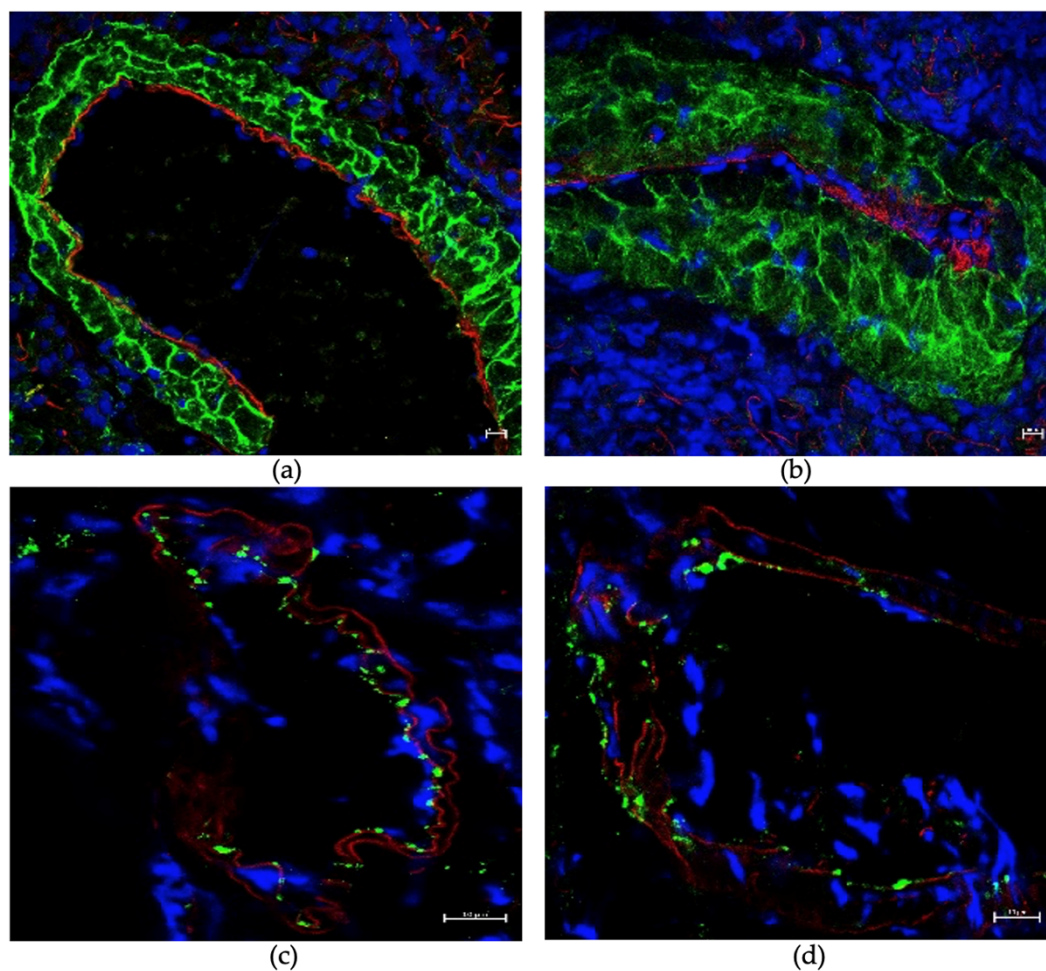

**Supplementary figure S7: Association of EVs with bronchioli and blood vessels in the lung.** Representative images of VCaP EVs in the lung 12 hours after intravenous injection with simultaneous staining of the epithelial marker EpCAM (a + b) or the vessel marker CD31 (c + d). EVs are depicted by red signals (PKH26), EpCAM (a + b) or CD31 (c + d) are stained green. Resolution 1000fold. Scale bar = 10μm.

## Supplementary Figure S8

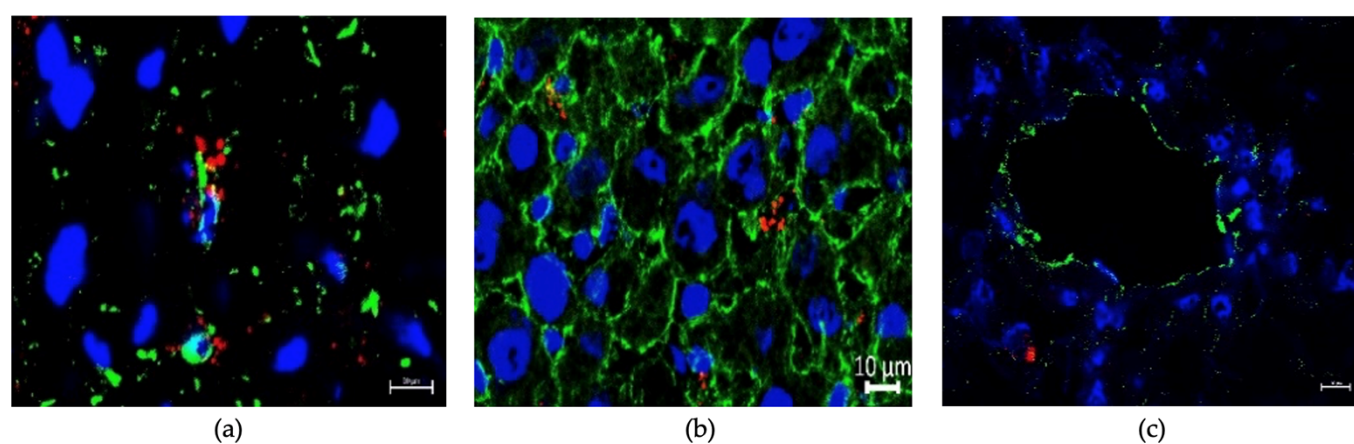

**Supplementary figure S8: Immunofluorescence stainings in the liver.** Representative images of VCaP EVs in the liver 12 hours after intravenous injection with simultaneous staining of the mesenchymal marker Vimentin (a), the cell membrane marker Na<sup>+</sup>-K<sup>+</sup>-ATPase (b) or the vessel marker CD31 (c). EVs are depicted by red signals (PKH26), Vimentin (a), Na<sup>+</sup>-K<sup>+</sup>-ATPase (b) or CD31 (c) are stained green. Resolution 1000fold. Scale bar = 10μm.

## Supplementary Figure S9

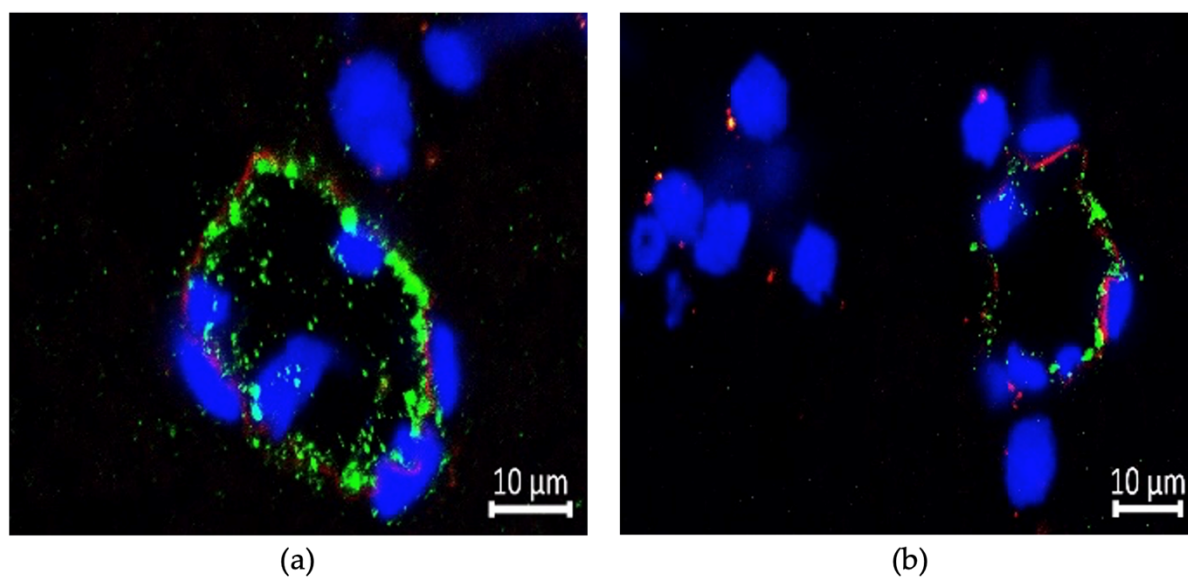

**Supplementary figure S9: Association of EVs with blood vessels in the brain.** Two representative images of VCaP EVs in the brain 12 hours after intravenous injection with simultaneous staining of the vessel marker CD31 (a + b). EVs are depicted by red signals (PKH26), CD31 is stained green. Resolution 1000fold. Scale bar = 10μm.

Supplementary Figure S10

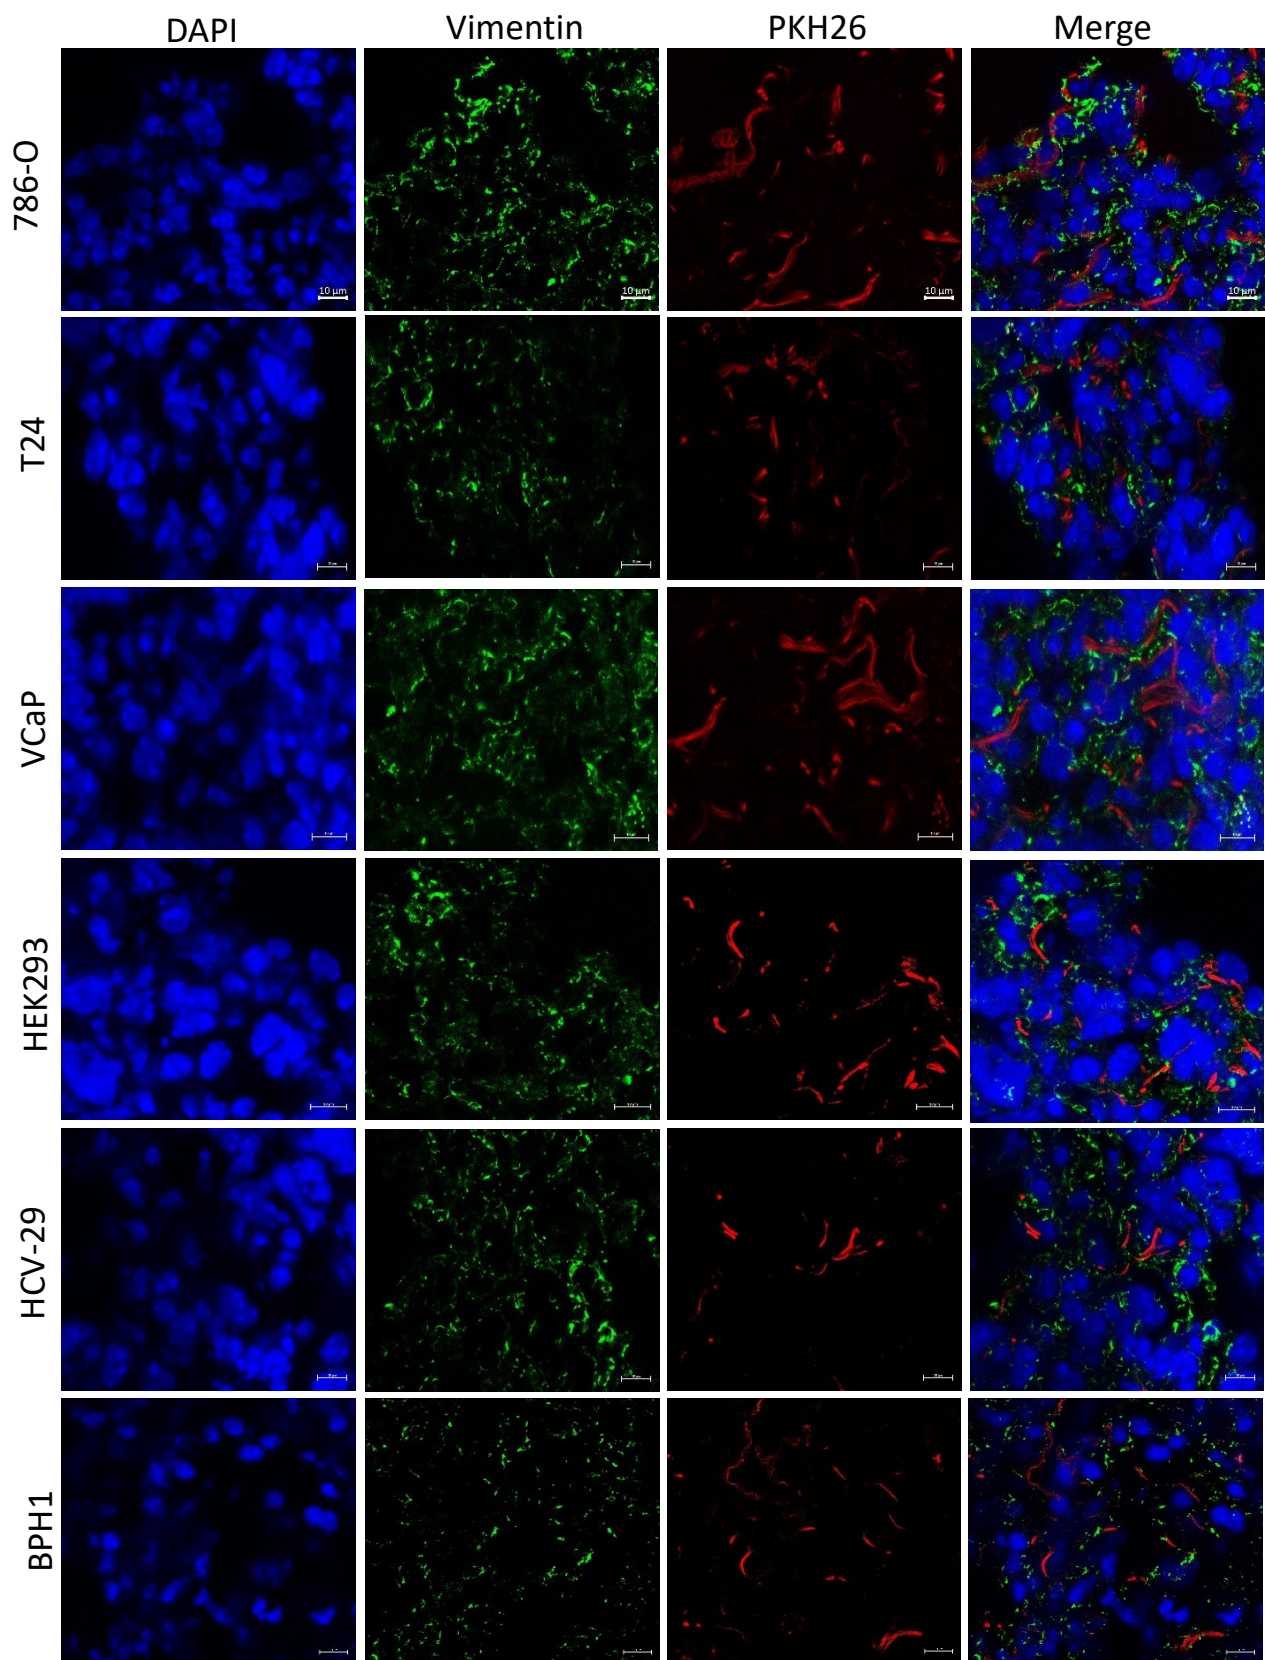

**Supplementary figure S10: Microscopic images of EVs in the lung with parallel staining of fibroblasts.** Fibroblasts were stained with an anti-Vimentin antibody, EVs are shown in red, nuclei in blue. Resolution 1000fold, Scale bar = 10µm

## Supplementary Figure S11

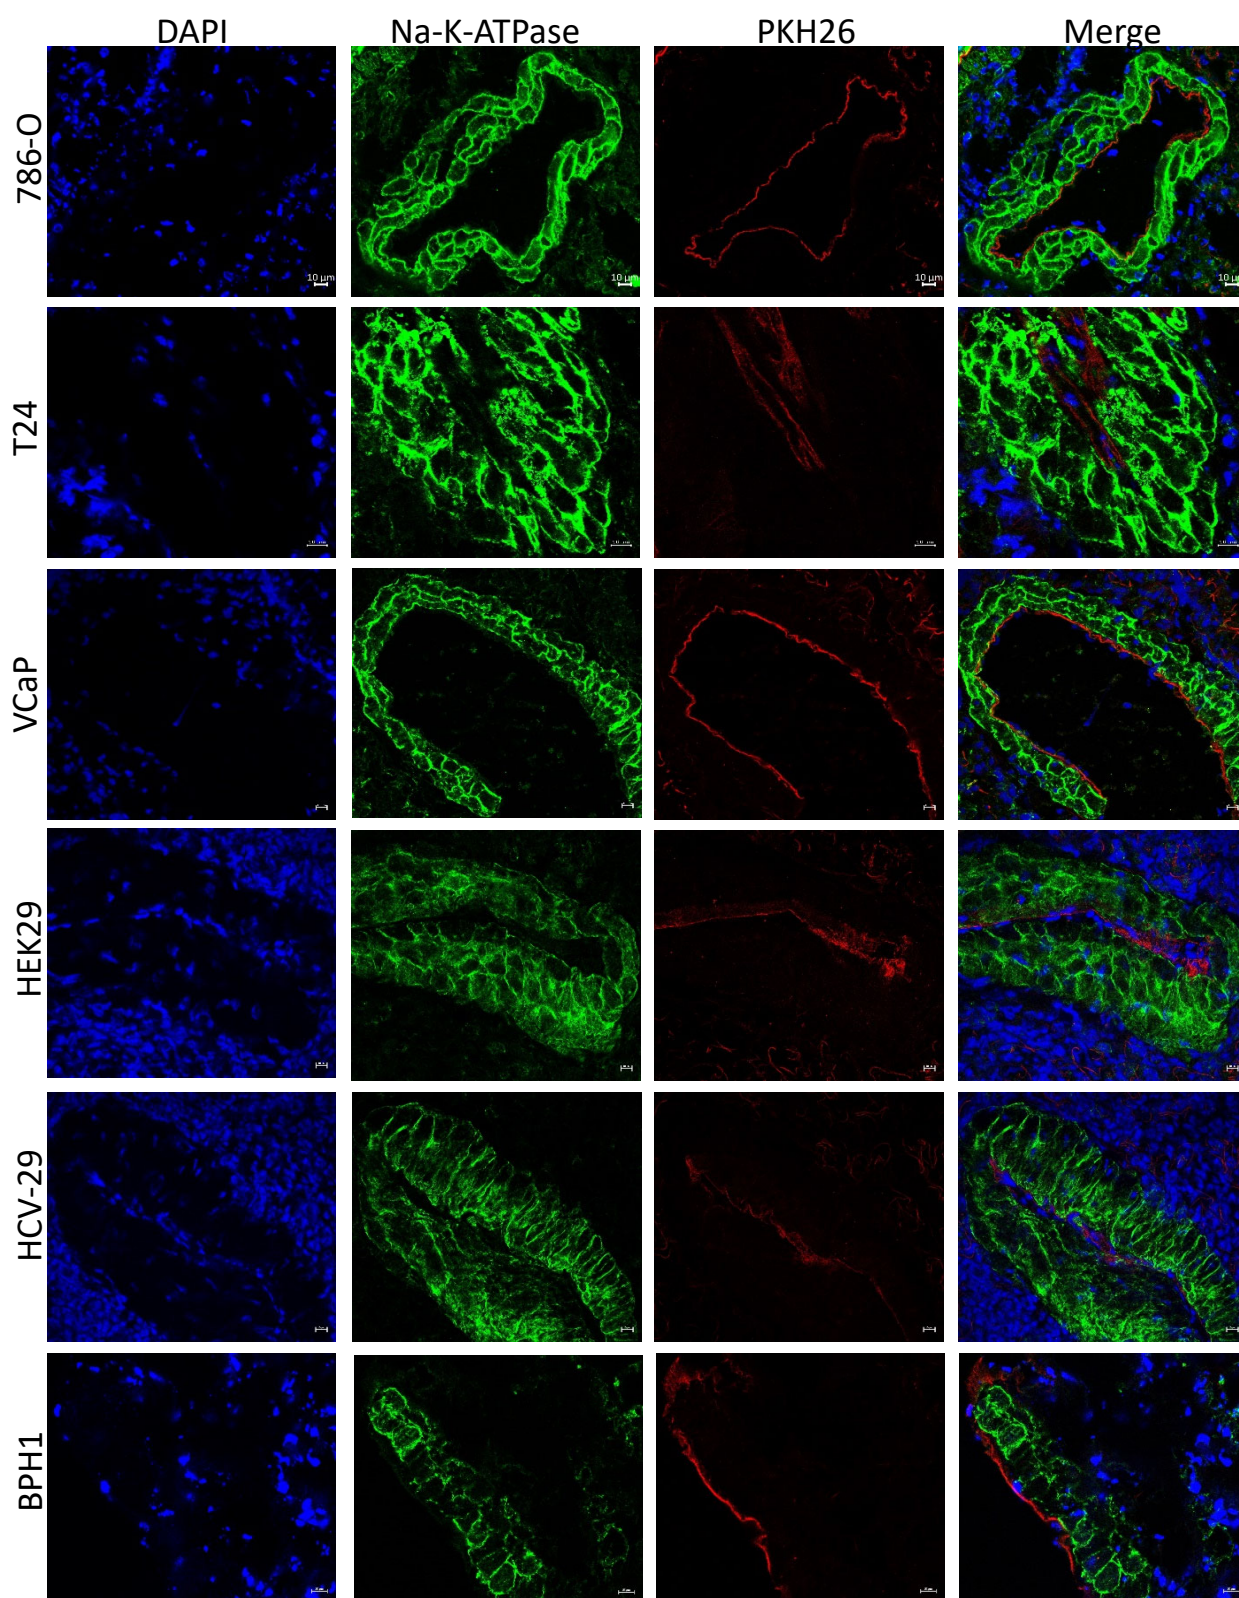

**Supplementary figure S11: Microscopic images of EVs in the lung with parallel staining of the cell membranes.** The cell membranes were stained with an anti- $\text{Na}^+\text{-K}^+\text{-ATPase}$  antibody, EVs are shown in red, nuclei in blue. Resolution 1000fold, Scale bar = 10μm

Supplementary Figure S12

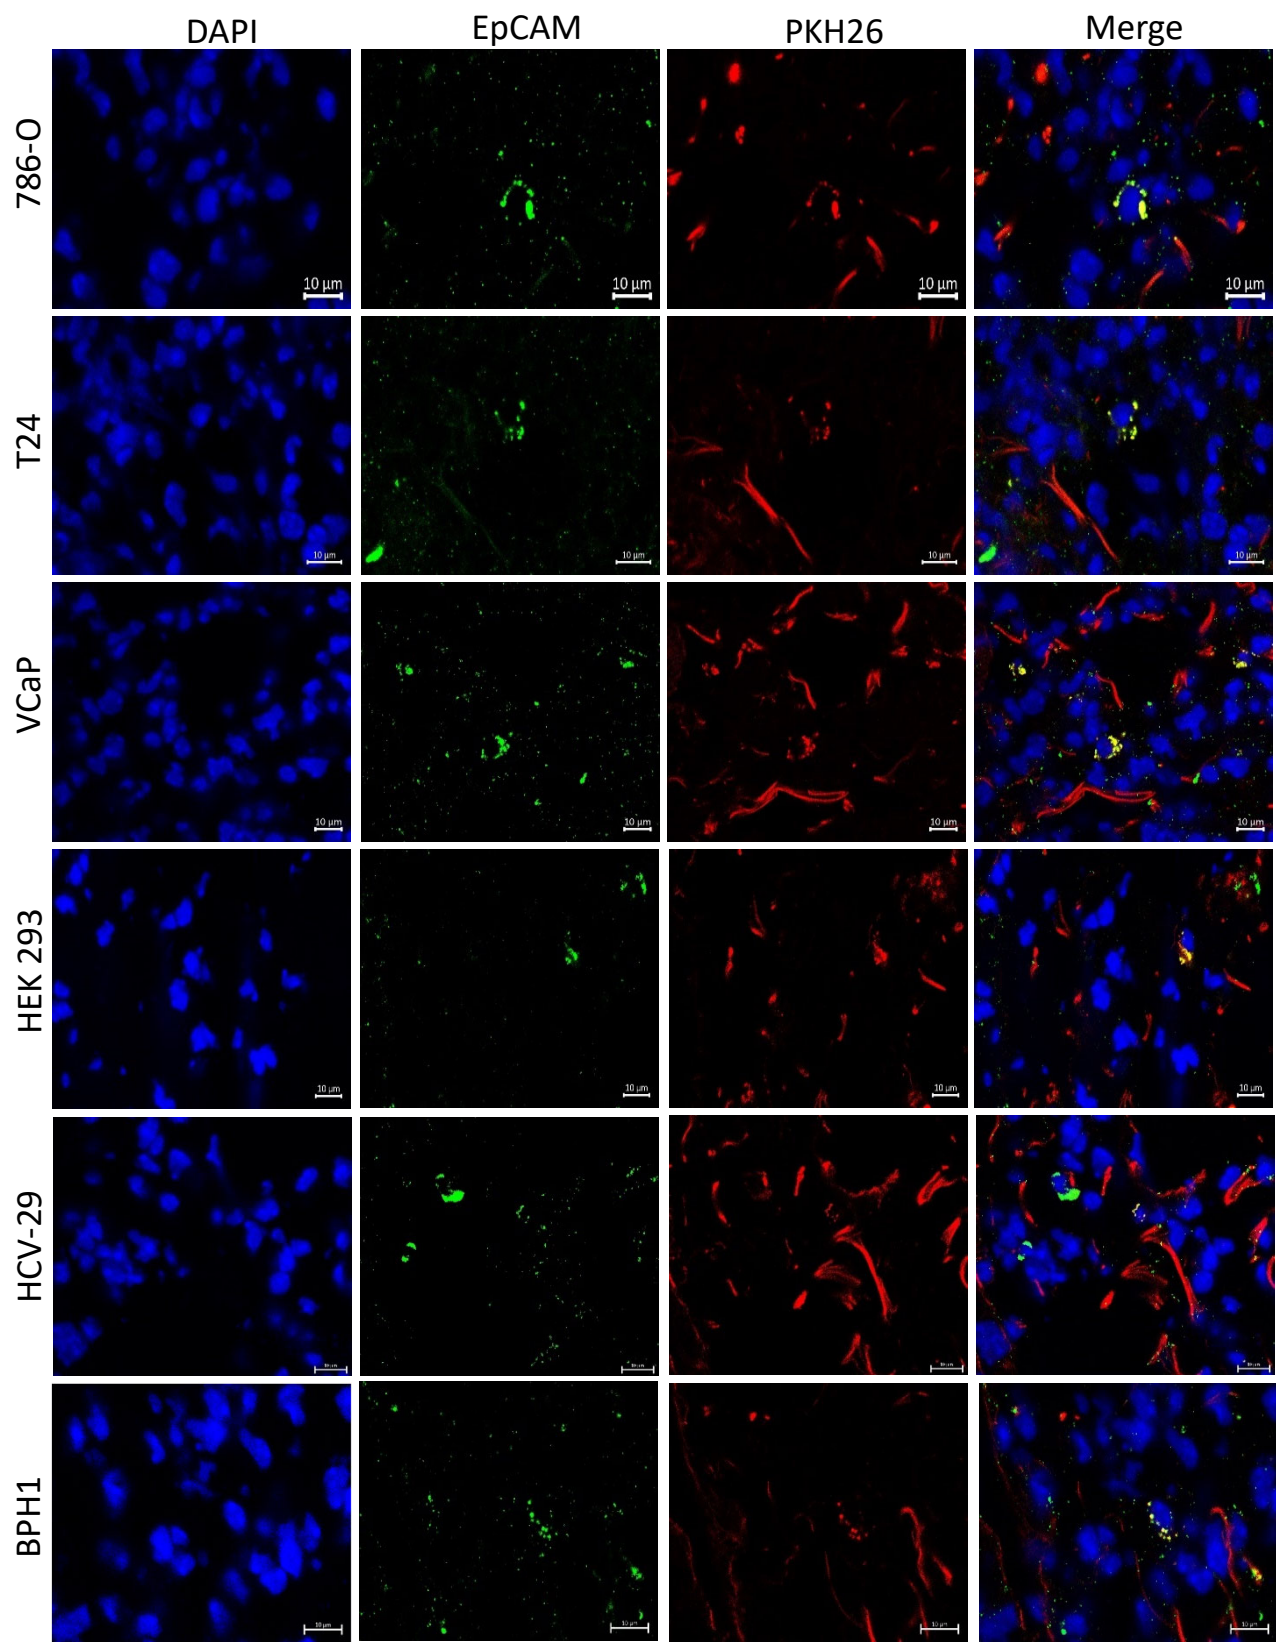

**Supplementary figure S12: Microscopic images of EVs in the lung with parallel staining of epithelial cells.** Epithelial cells were stained with an anti-EpCAM antibody, EVs are shown in red, nuclei in blue. Resolution 1000fold, Scale bar = 10µm

Supplementary Figure S13

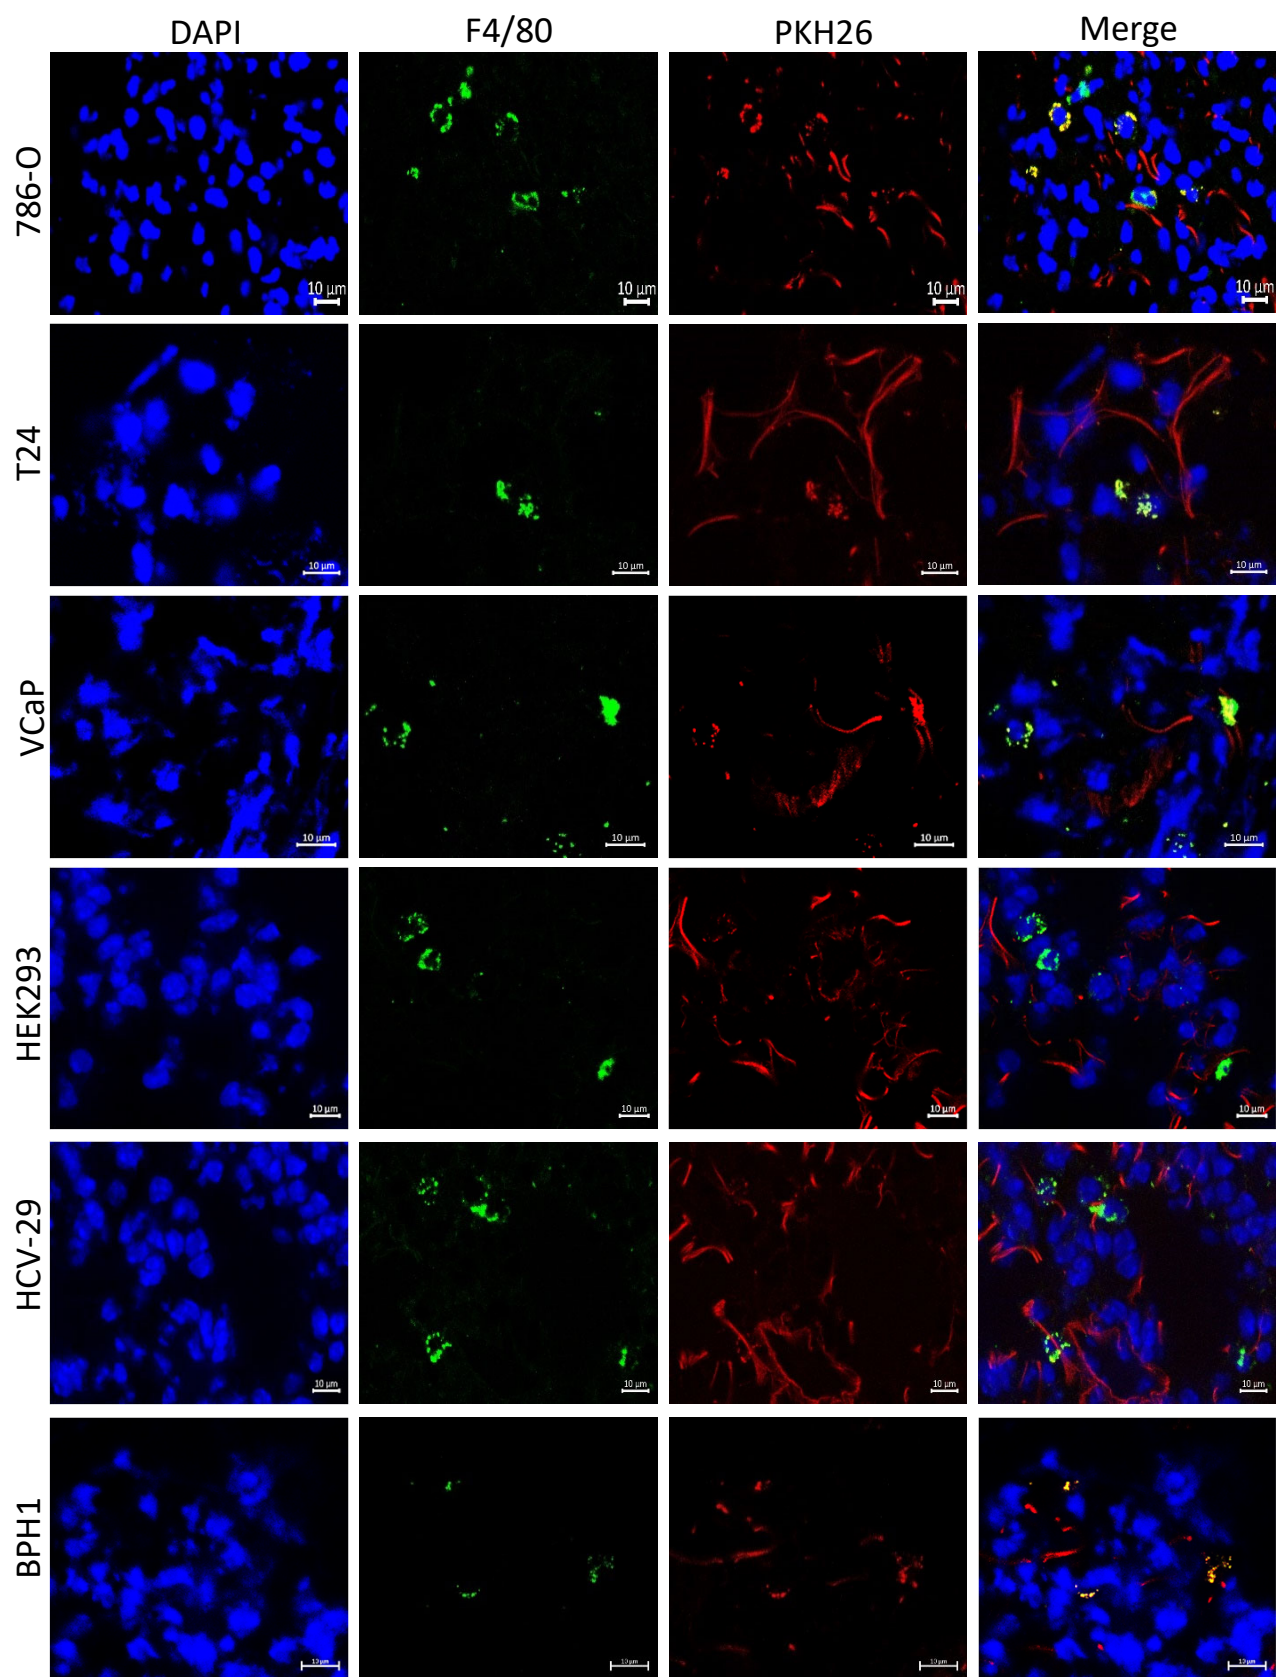

**Supplementary figure S13: Microscopic images of EVs in the lung with parallel staining of macrophages.** Macrophages were stained with an anti-F4/80 antibody, EVs are shown in red, nuclei in blue. Resolution 1000fold, Scale bar = 10μm

Supplementary Figure S14

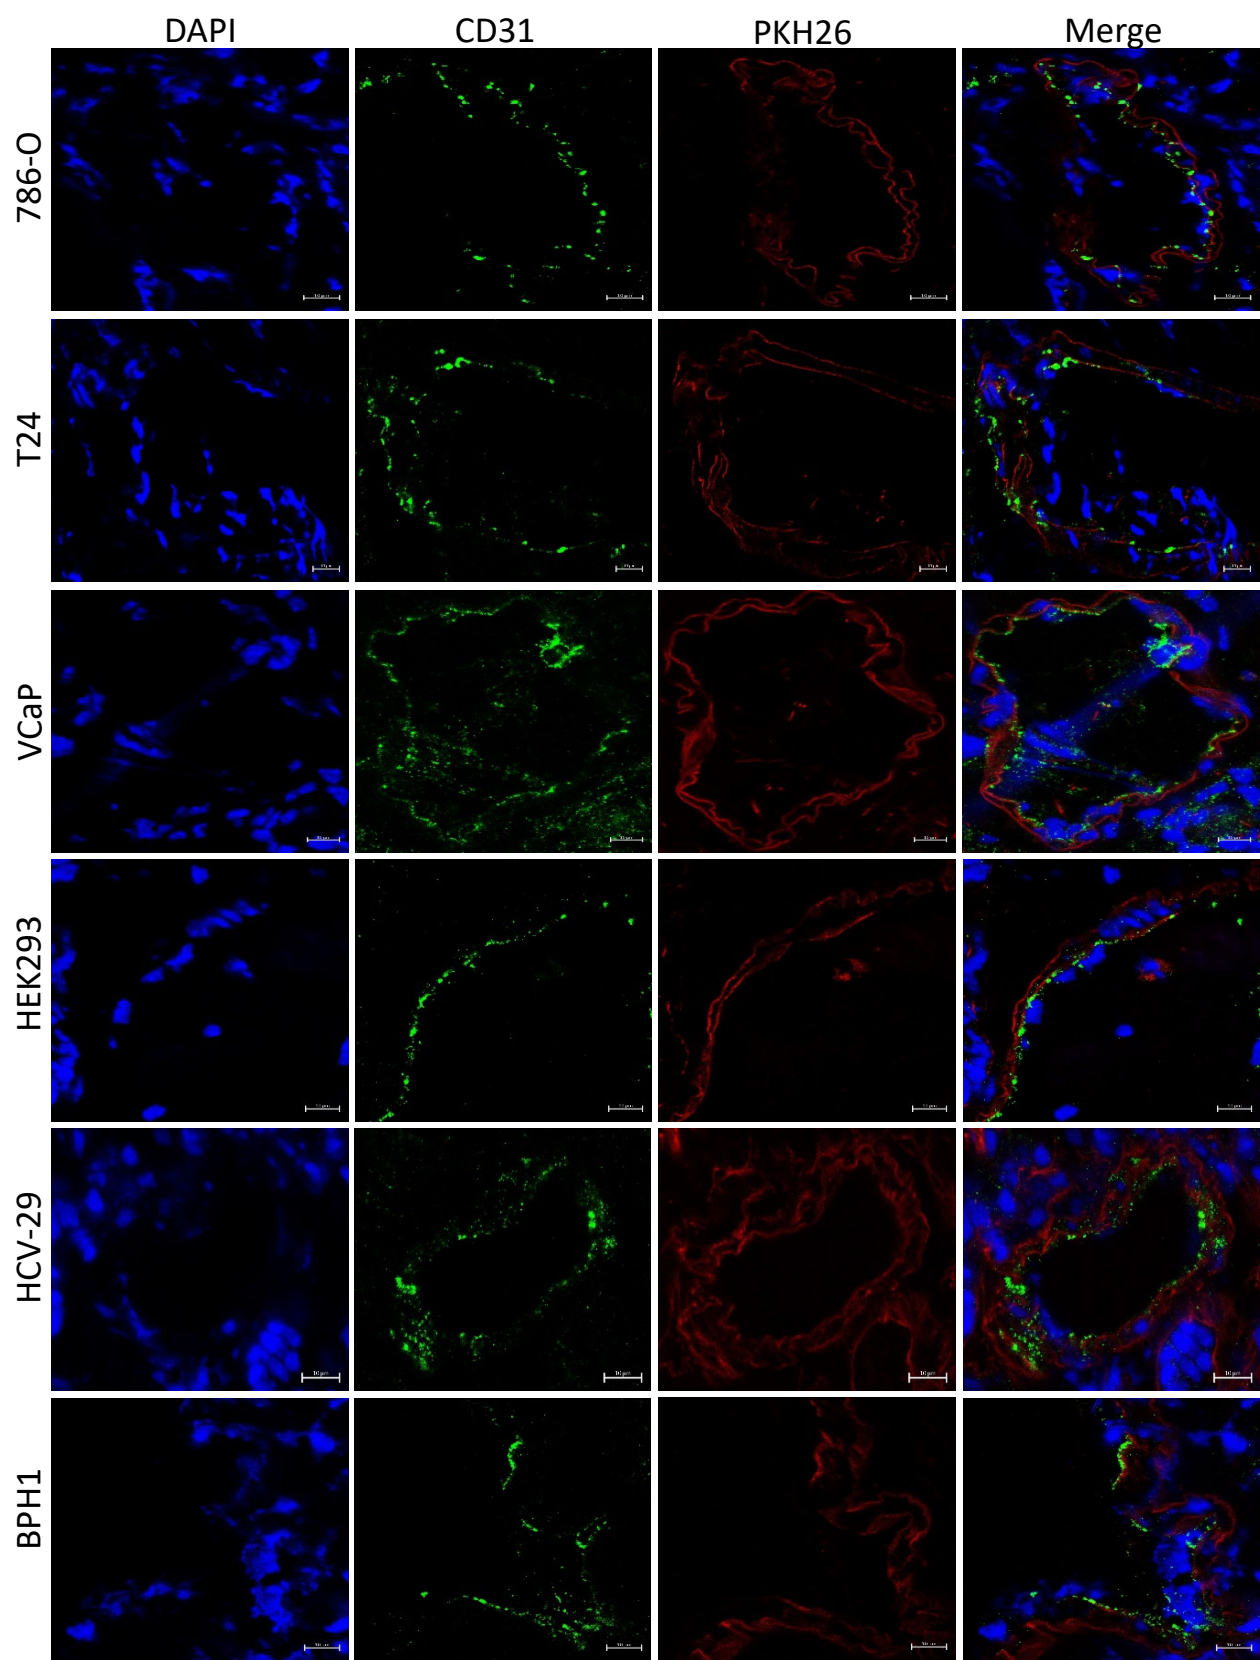

**Supplementary figure S14: Microscopic images of EVs in the lung with parallel staining of endothelial cells.** Endothelial cells were stained with an anti-CD31 antibody, EVs are shown in red, nuclei in blue. Resolution 1000fold, Scale bar = 10µm

Supplementary Figure S15

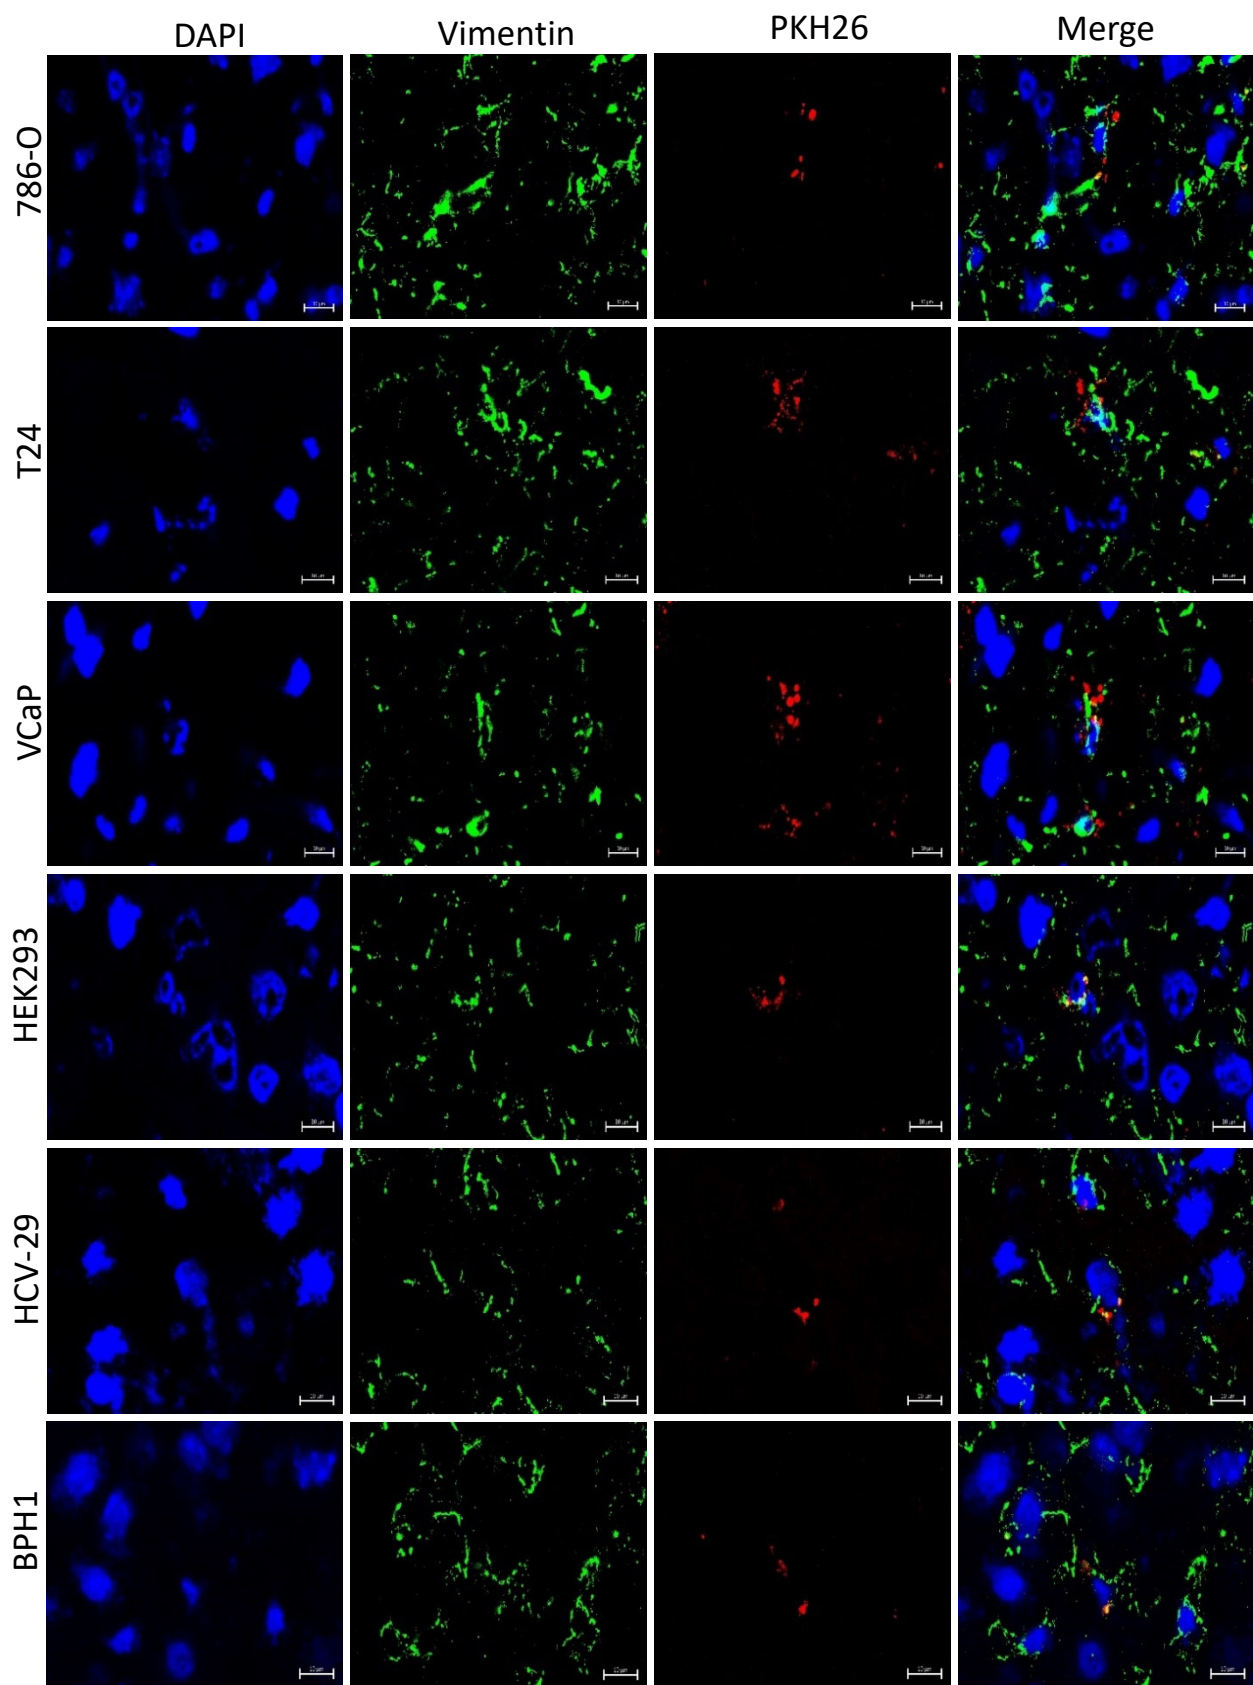

**Supplementary figure S15: Microscopic images of EVs in the liver with parallel staining of fibroblasts.** Fibroblasts were stained with an anti-Vimentin antibody, EVs are shown in red, nuclei in blue. Resolution 1000fold, Scale bar = 10µm

Supplementary Figure S16

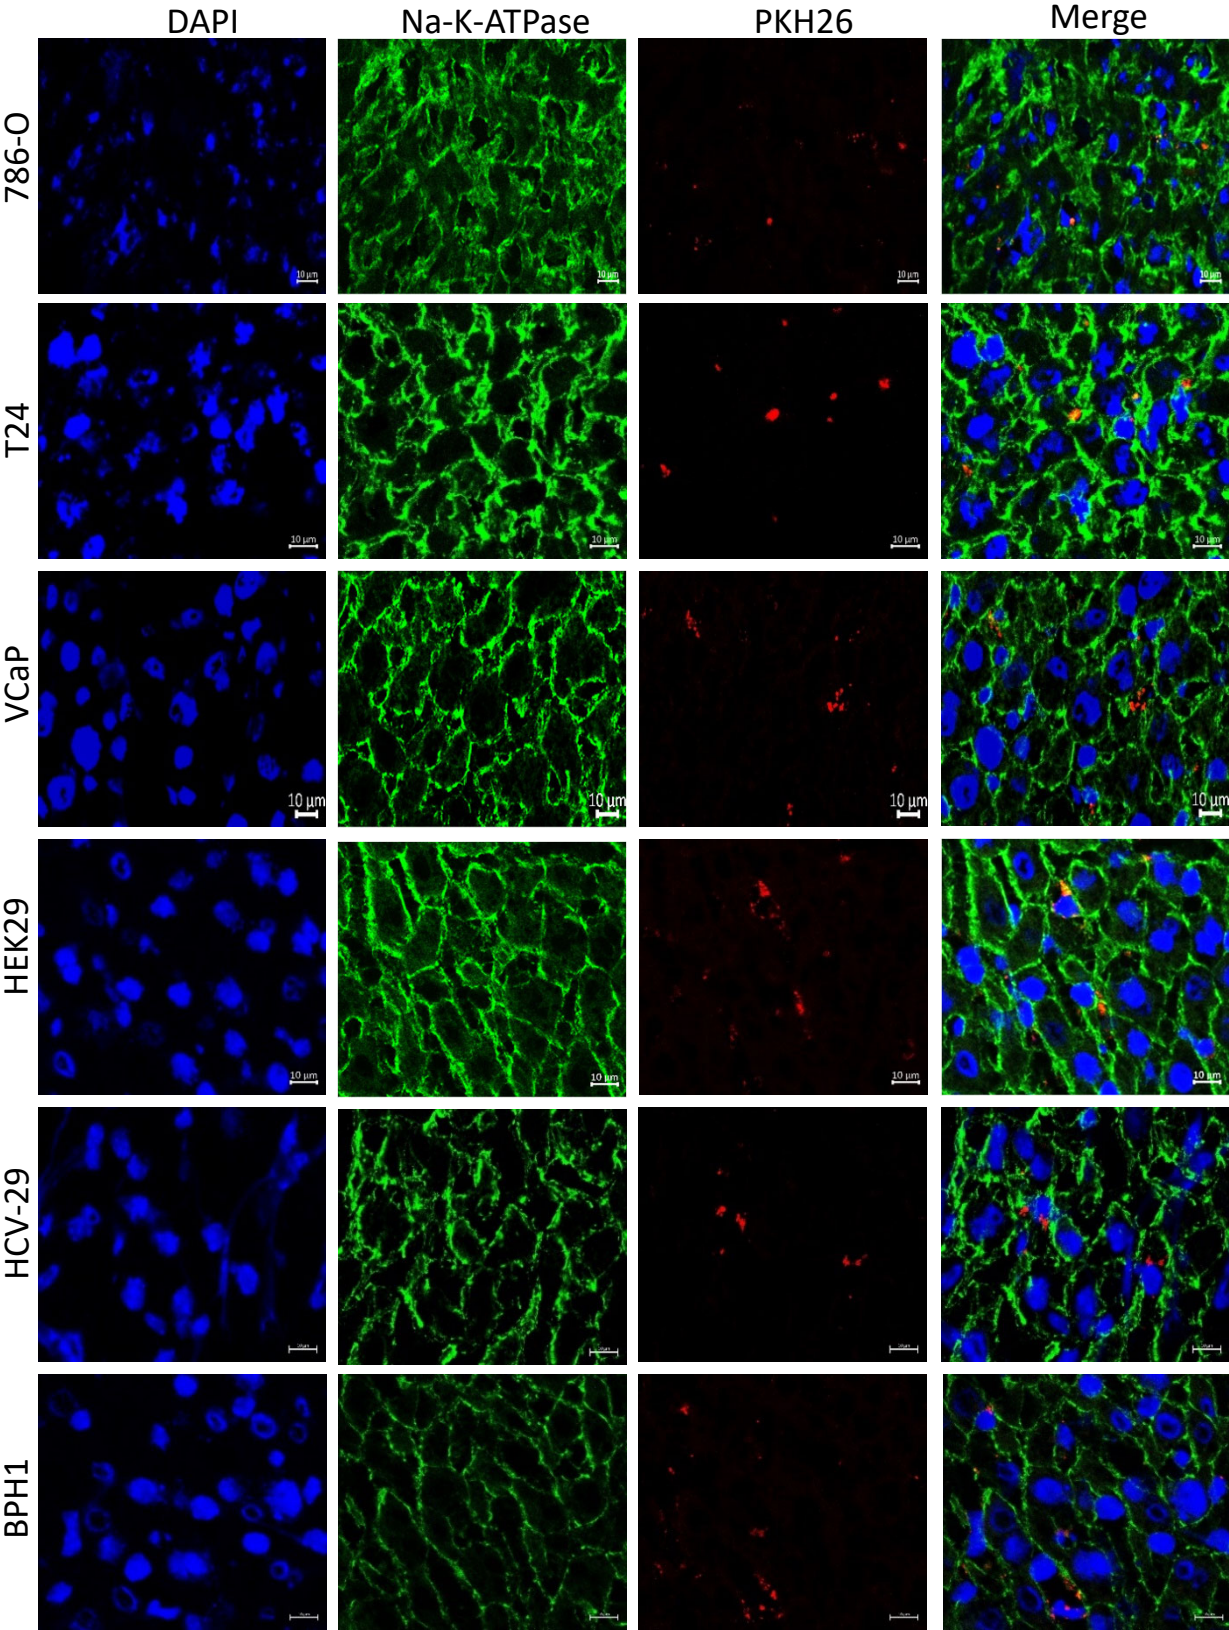

**Supplementary figure S16: Microscopic images of EVs in the liver with parallel staining of the cell membranes.** The cell membranes were stained with an anti- $\text{Na}^+\text{-K}^+\text{-ATPase}$  antibody, EVs are shown in red, nuclei in blue. Resolution 1000fold, Scale bar = 10 $\mu\text{m}$

Supplementary Figure S17

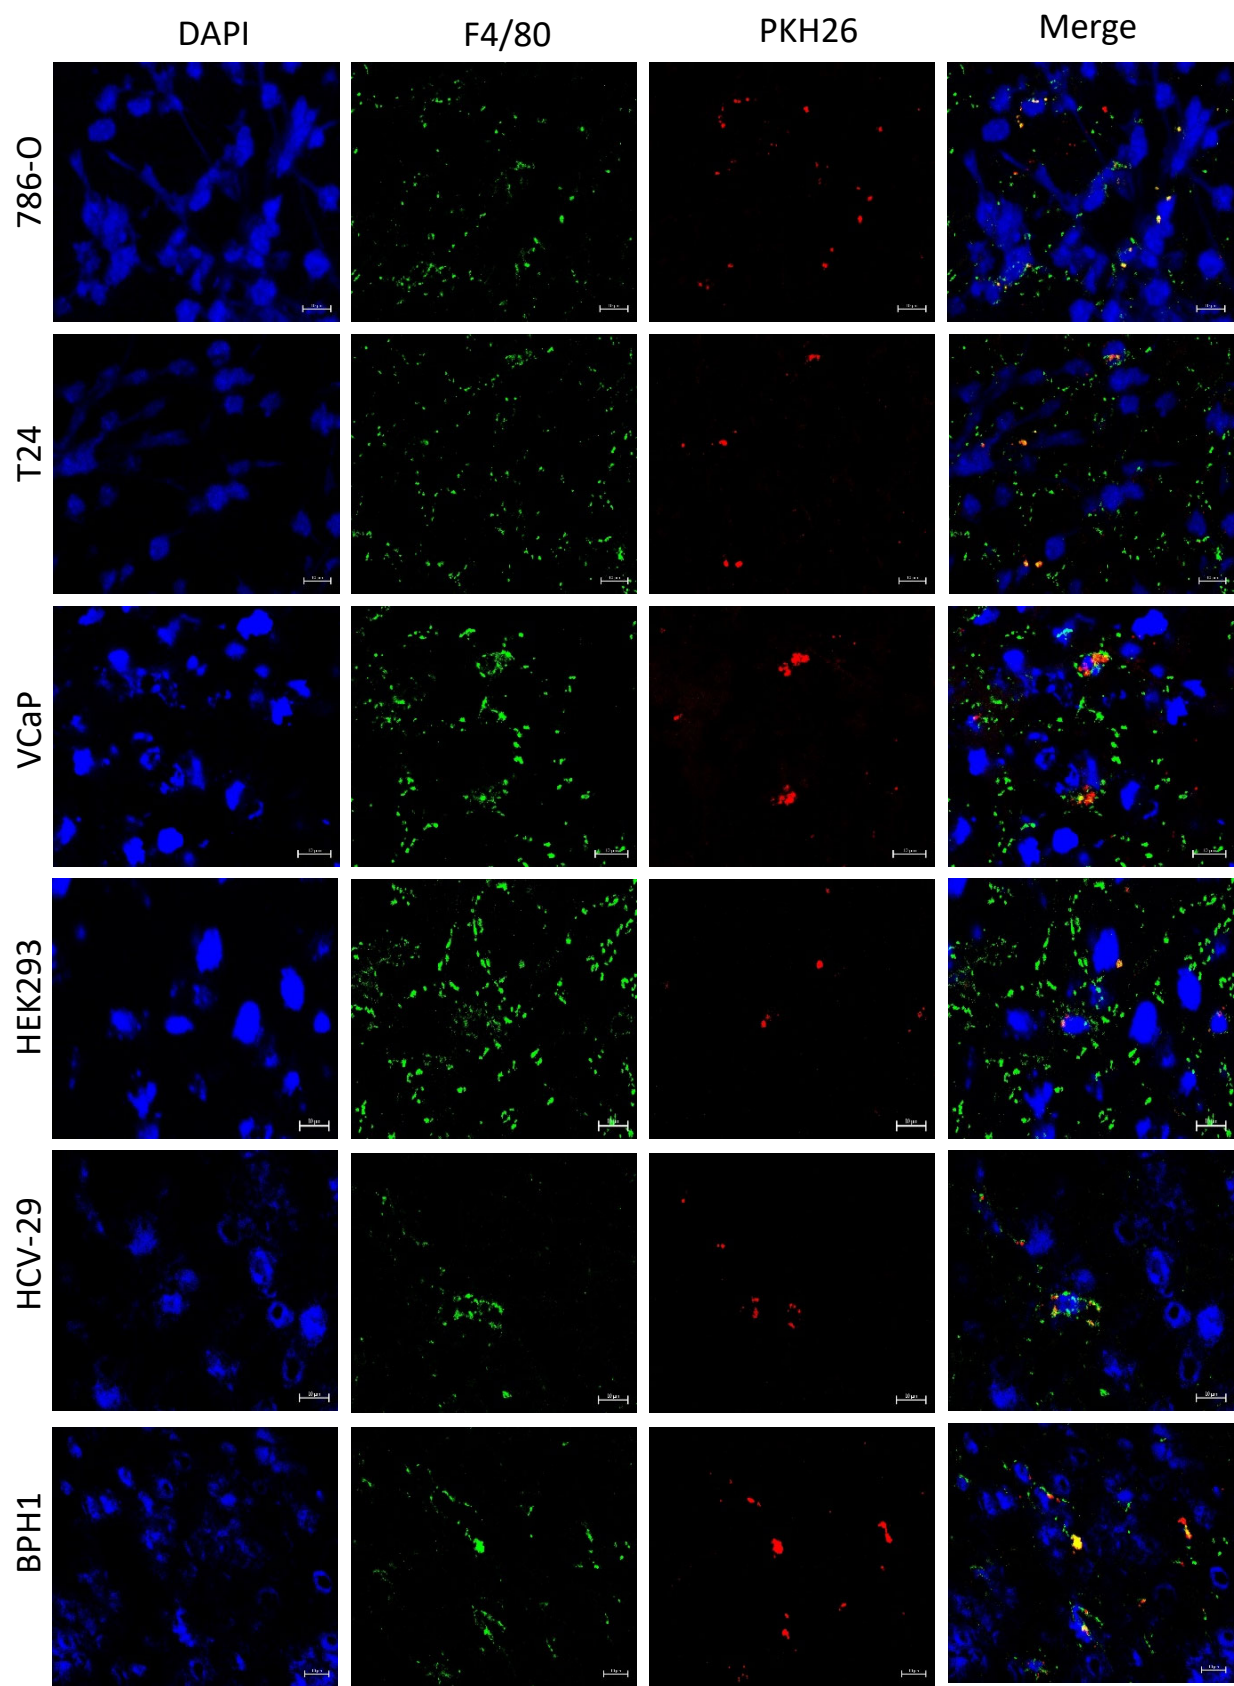

**Supplementary figure S17: Microscopic images of EVs in the liver with parallel staining of macrophages.** Macrophages were stained with an anti-F4/80 antibody, EVs are shown in red, nuclei in blue. Resolution 1000fold, Scale bar = 10µm

Supplementary Figure S18

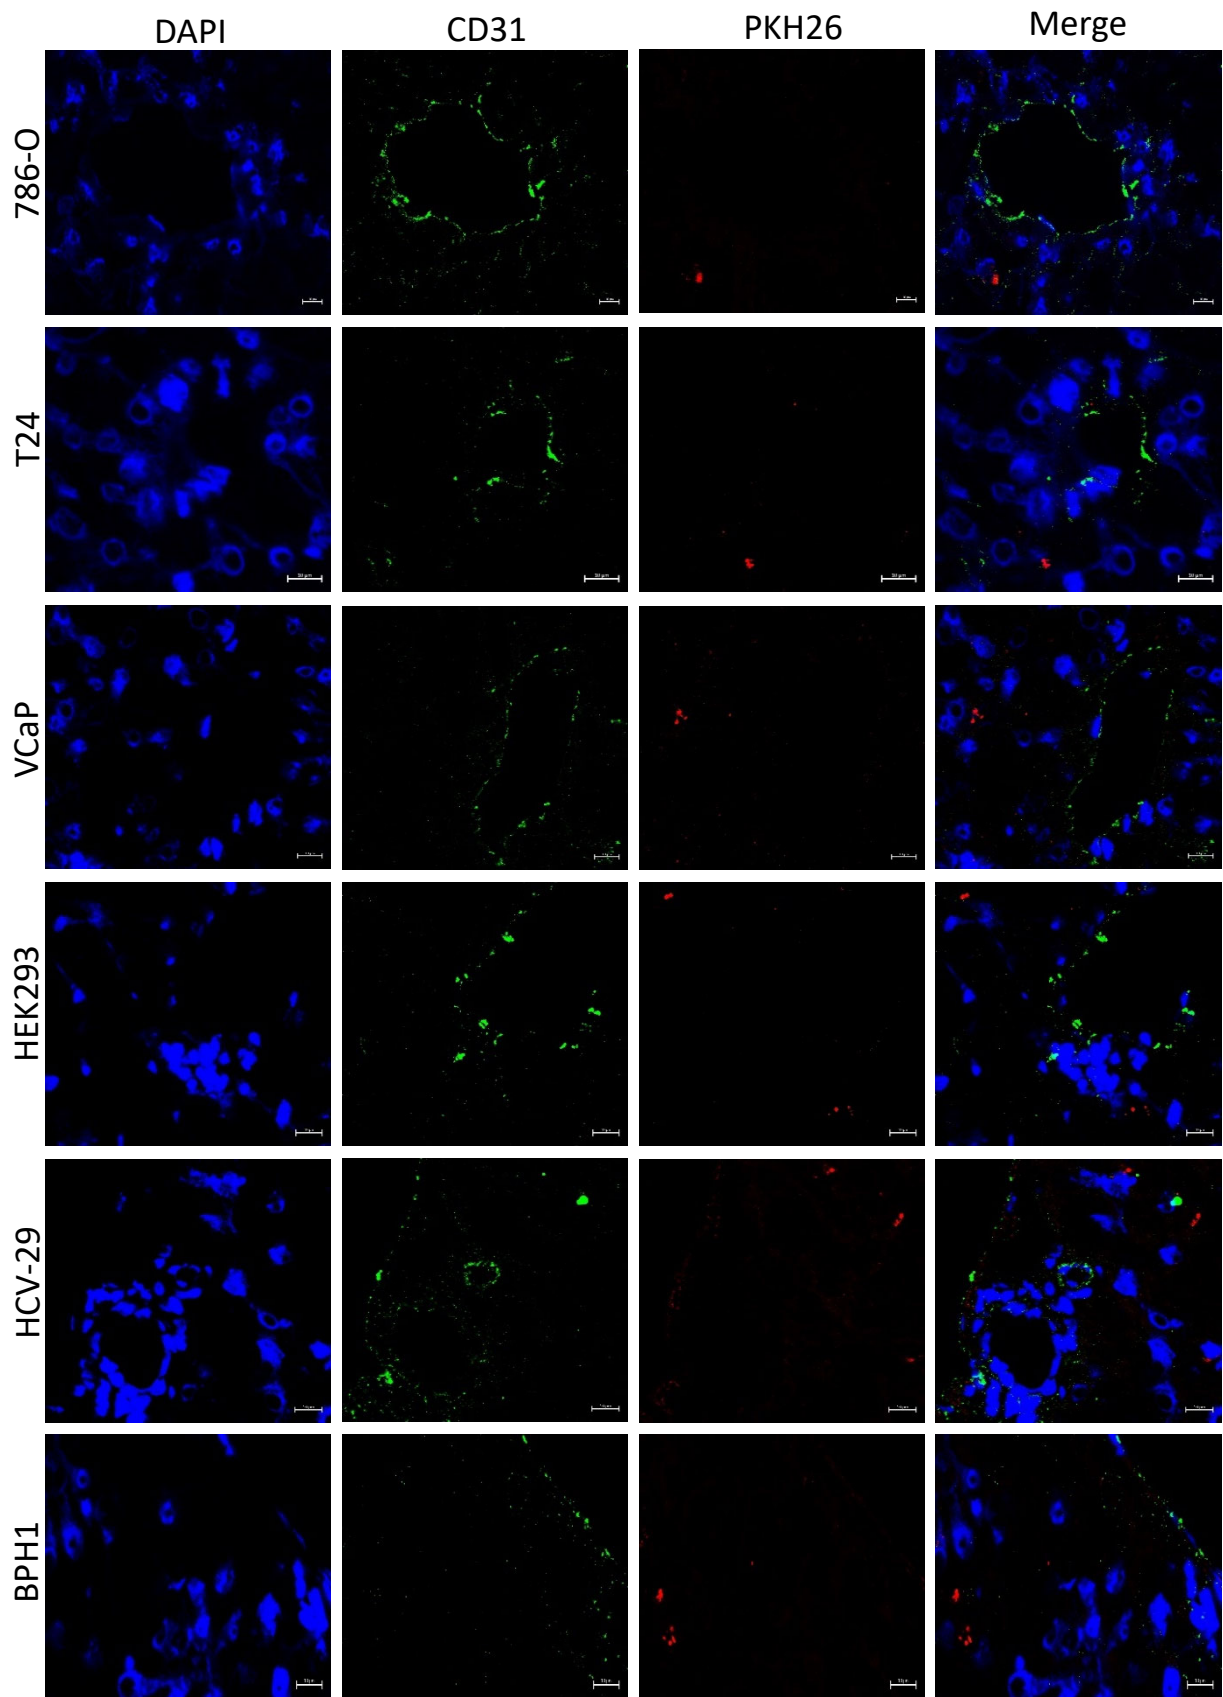

**Supplementary figure S18: Microscopic images of EVs in the liver with parallel staining of endothelial cells.** Endothelial cells were stained with an anti-CD31 antibody, EVs are shown in red, nuclei in blue. Resolution 1000fold, Scale bar = 10µm

Supplementary Figure S19

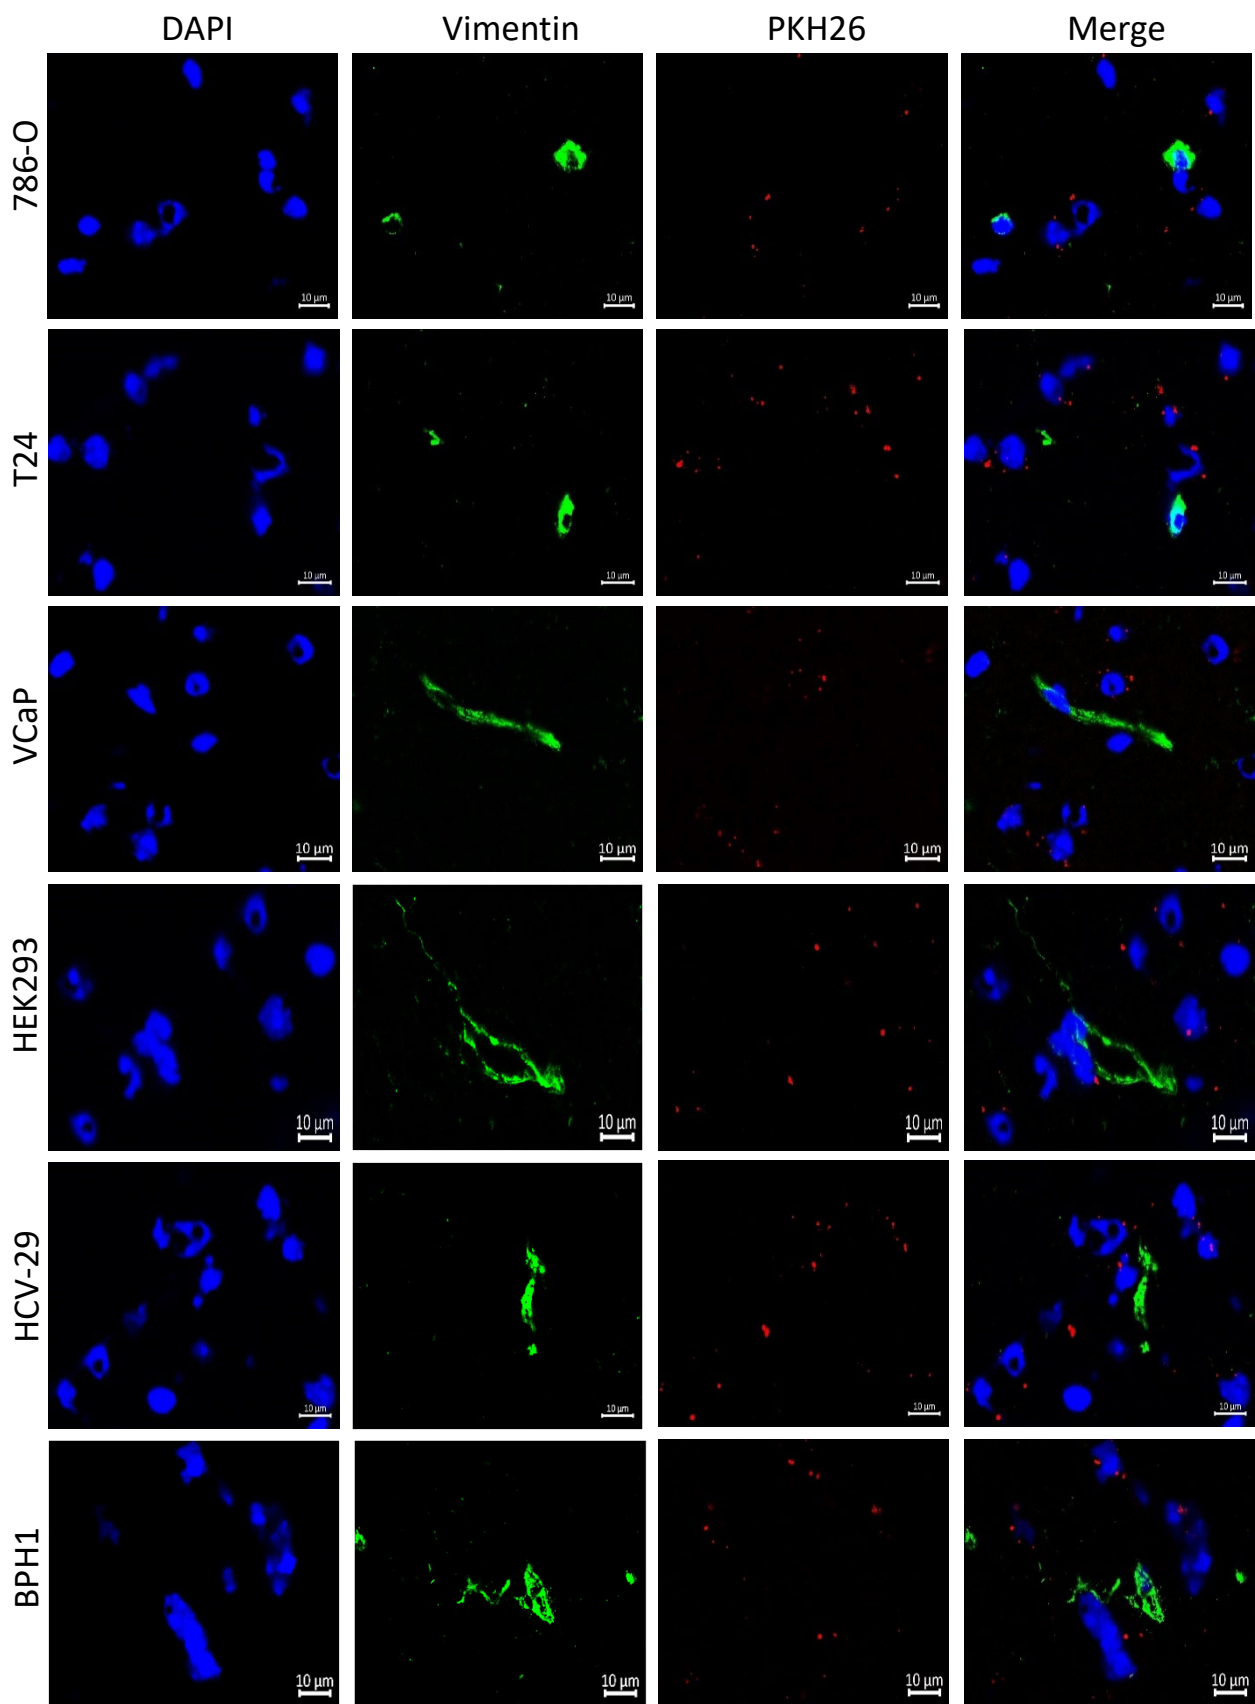

**Supplementary figure S19: Microscopic images of EVs in the brain with parallel staining of fibroblasts.** Fibroblasts were stained with an anti-Vimentin antibody, EVs are shown in red, nuclei in blue. Resolution 1000fold, Scale bar = 10µm

Supplementary Figure S20

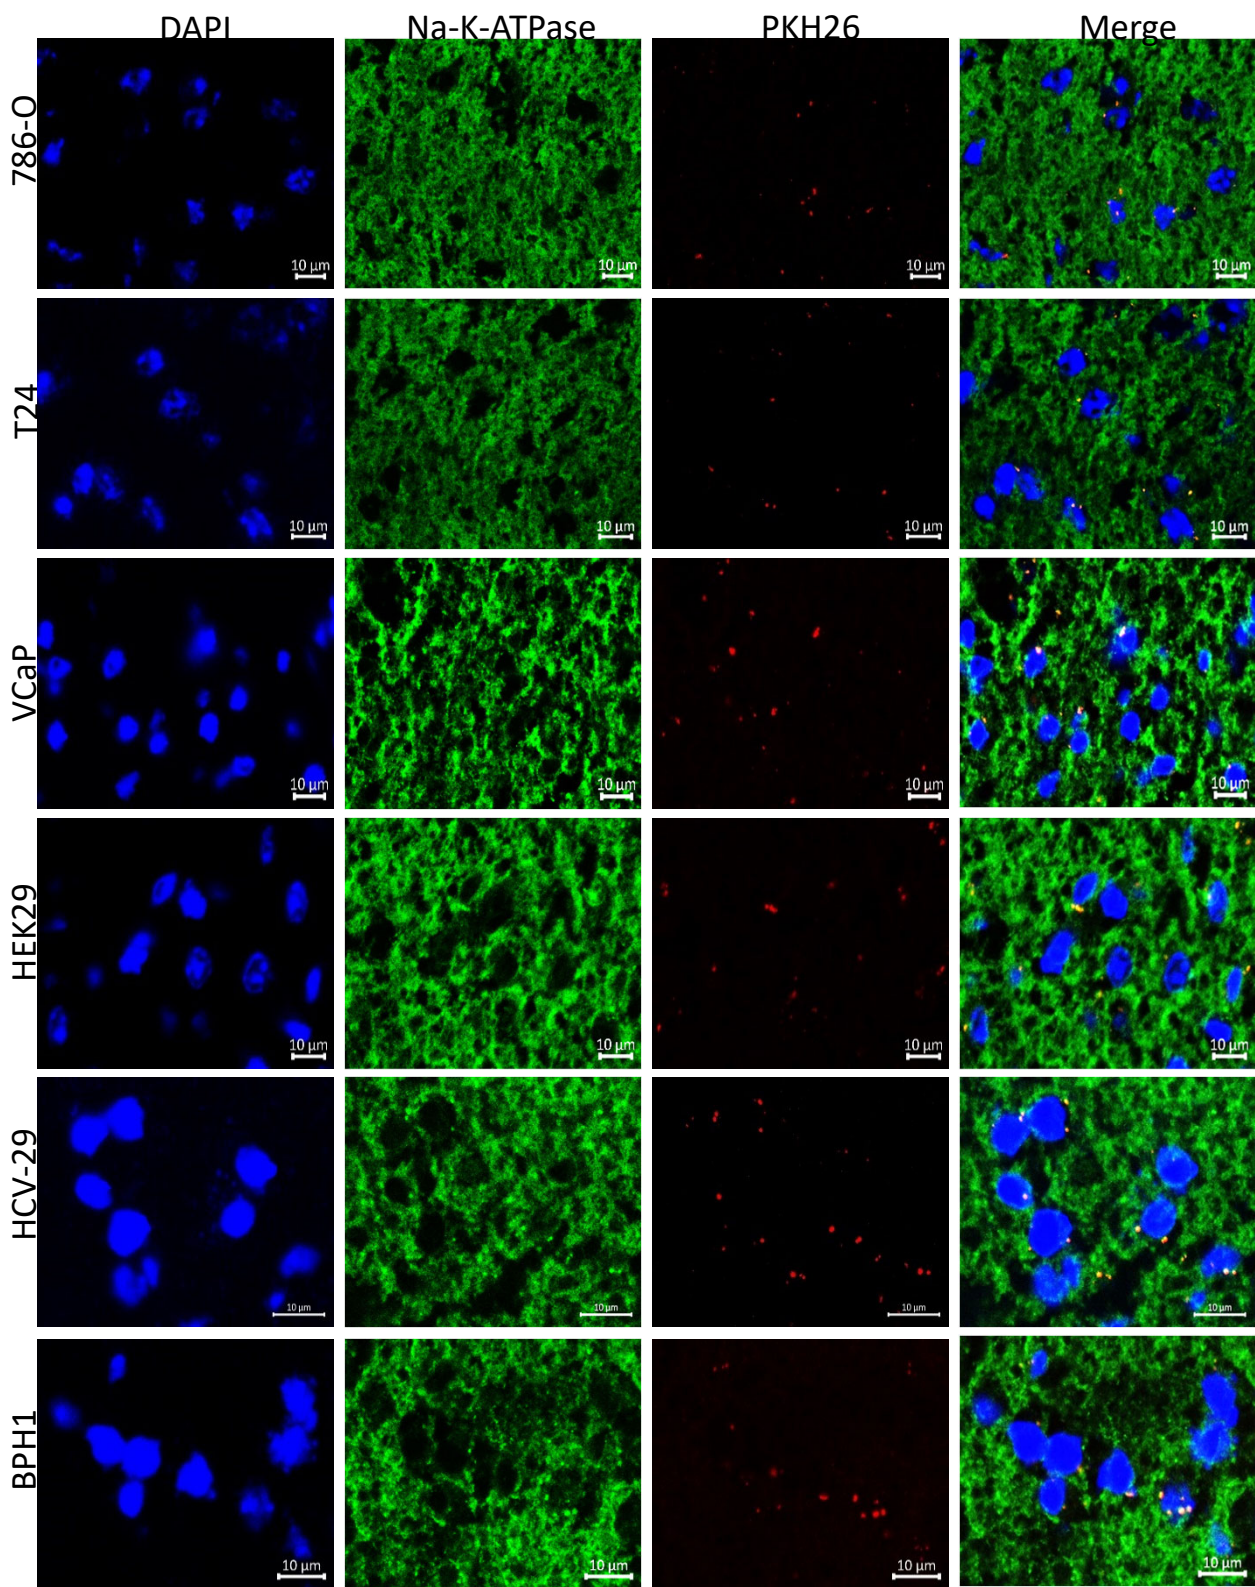

**Supplementary figure S21: Microscopic images of EVs in the brain with parallel staining of the cell membranes.** Cell membranes were stained with an anti- $\text{Na}^+\text{-K}^+\text{-ATPase}$  antibody, EVs are shown in red, nuclei in blue. Resolution 1000fold, Scale bar = 10μm

Supplementary Figure S21

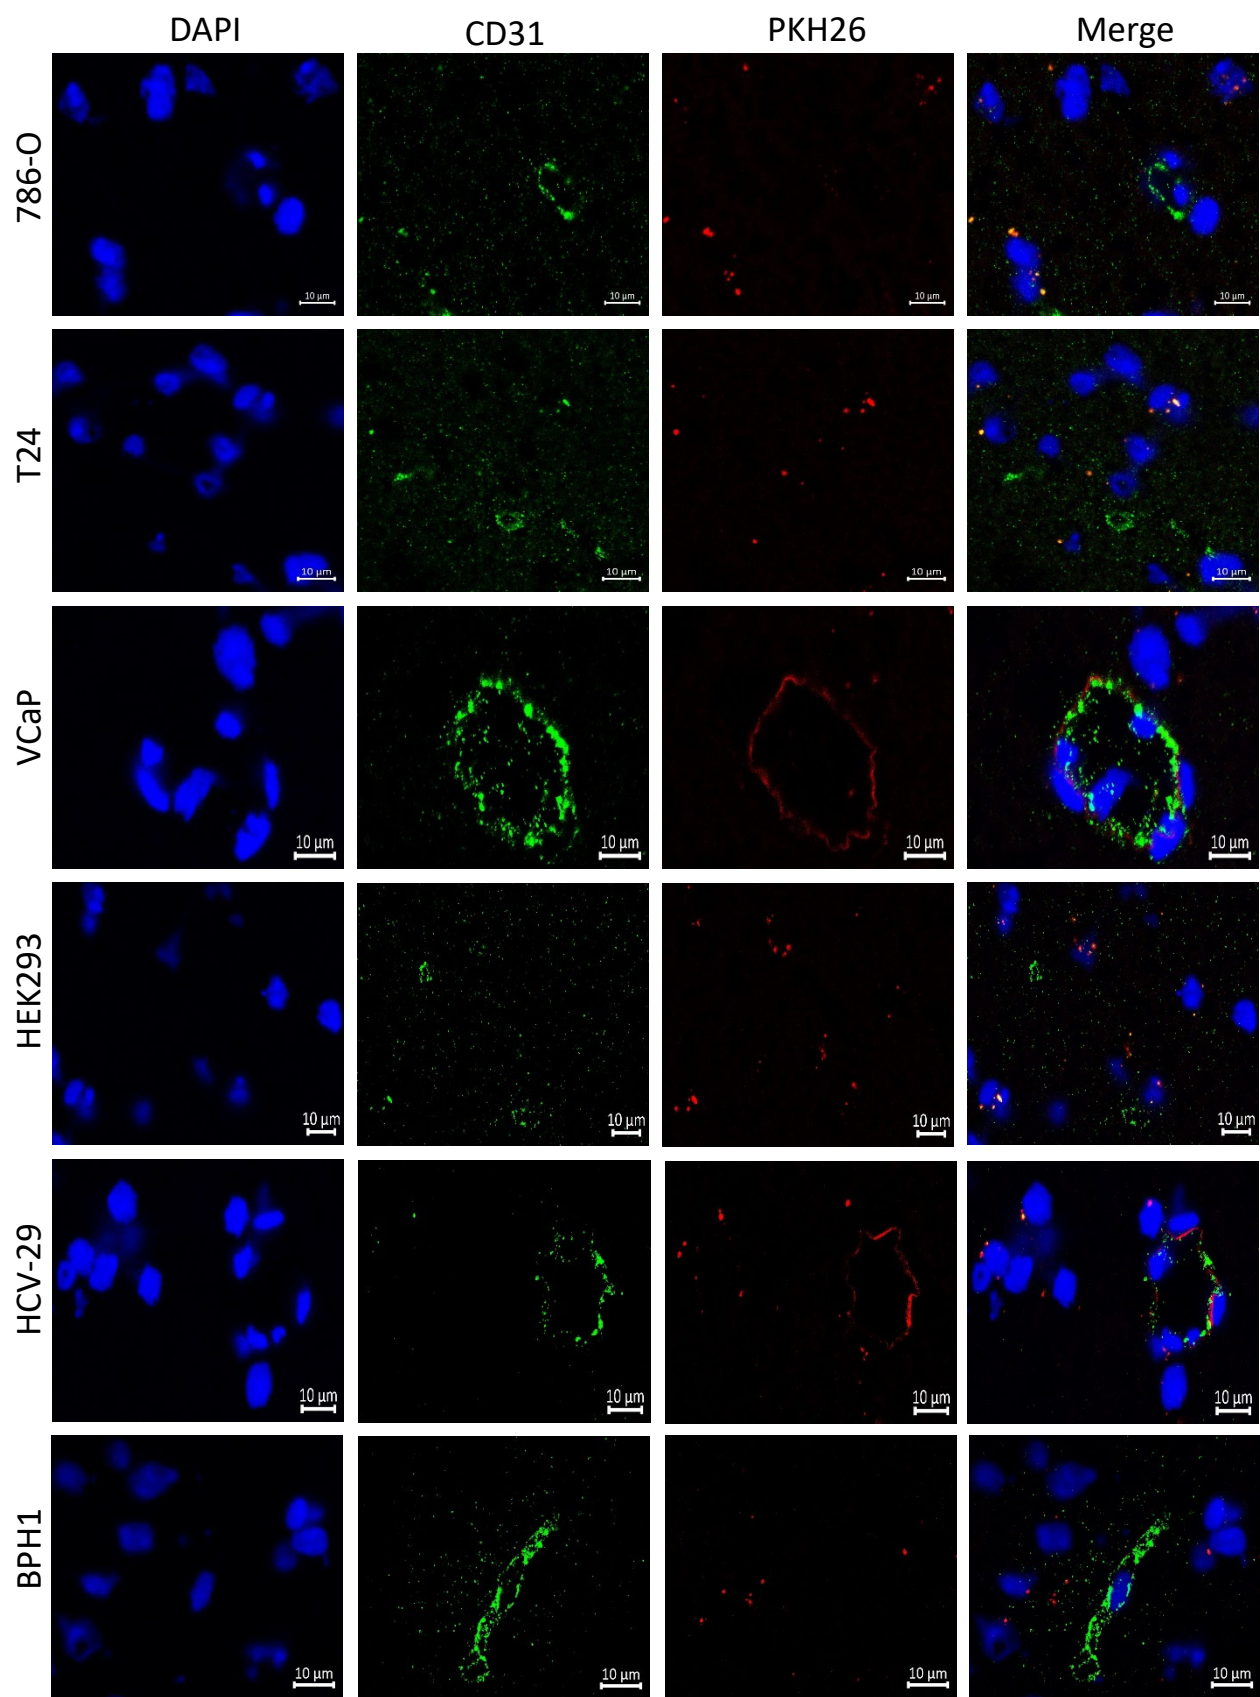

**Supplementary figure S21: Microscopic images of EVs in the brain with parallel staining of endothelial cells.** Endothelial cells were stained with an anti-CD31 antibody, EVs are shown in red, nuclei in blue. Resolution 1000fold, Scale bar = 10µm
